# Supplementary material for: Genome-wide detection of signatures of selection in indicine and Brazilian locally adapted taurine cattle breeds using whole-genome re-sequencing data
Source: PubMed Central journal article supplement (PMC7488563; doi:10.1186/s12864-020-07035-6), 2020-09-11

Pantaneiro

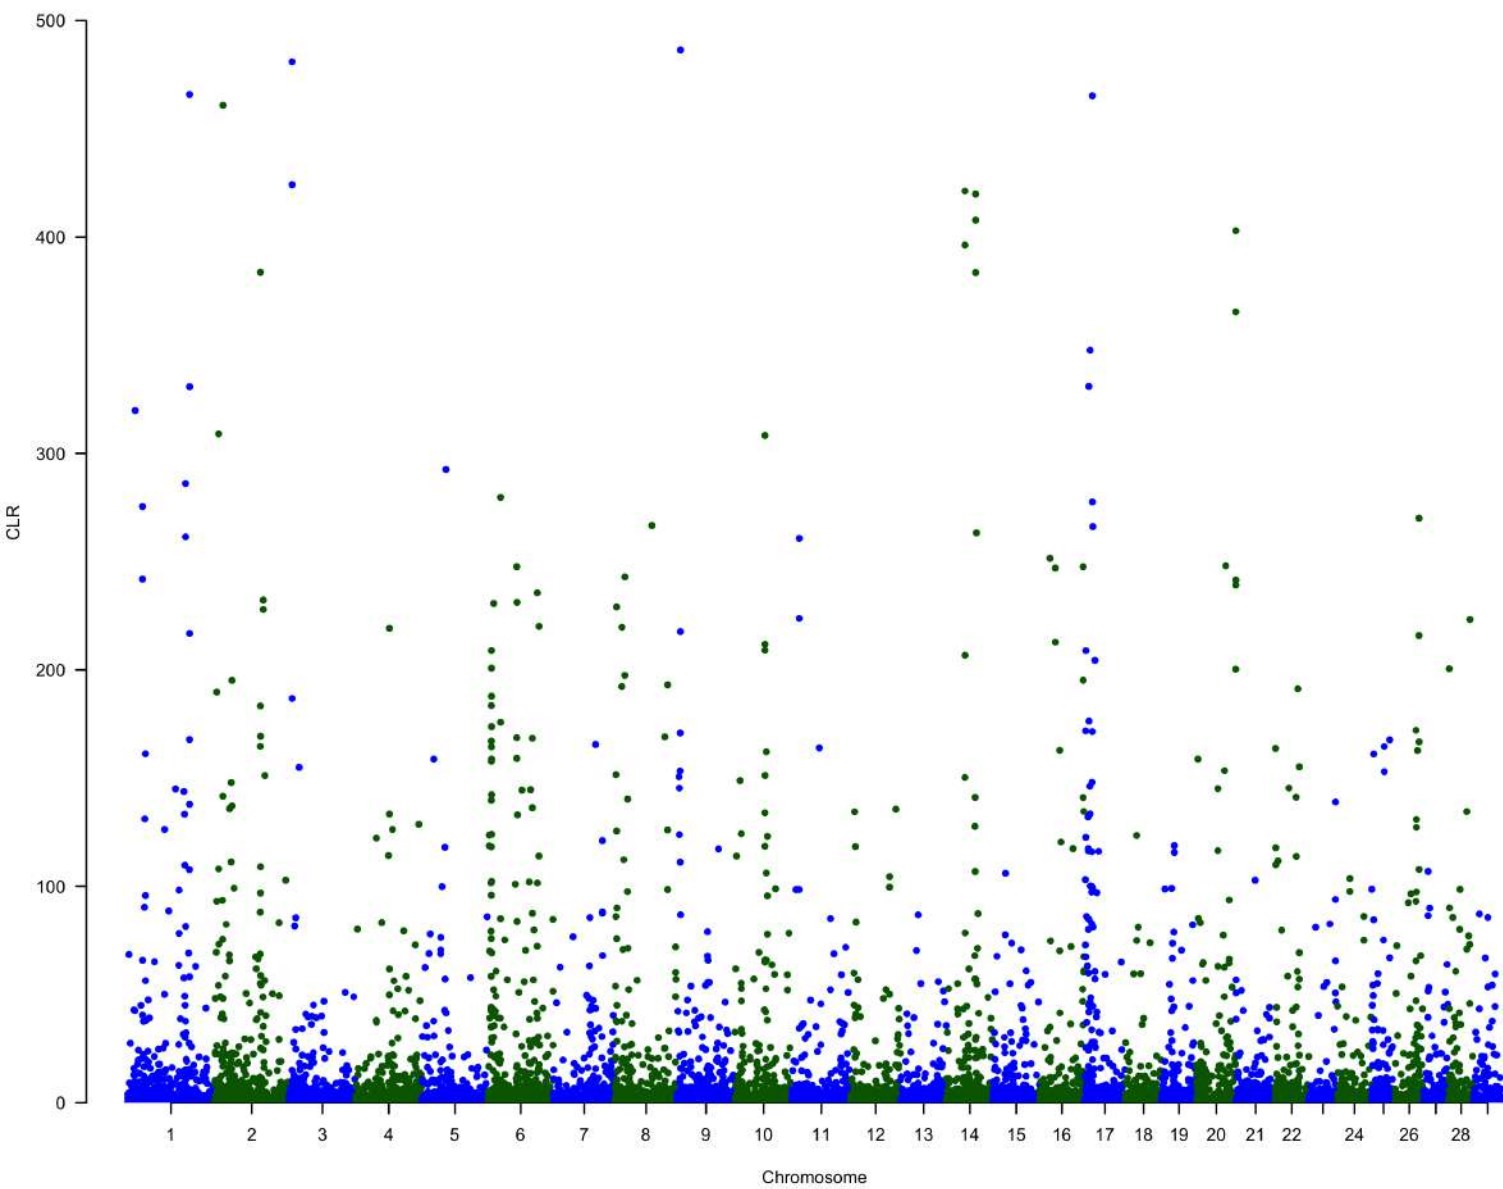

Crioulo

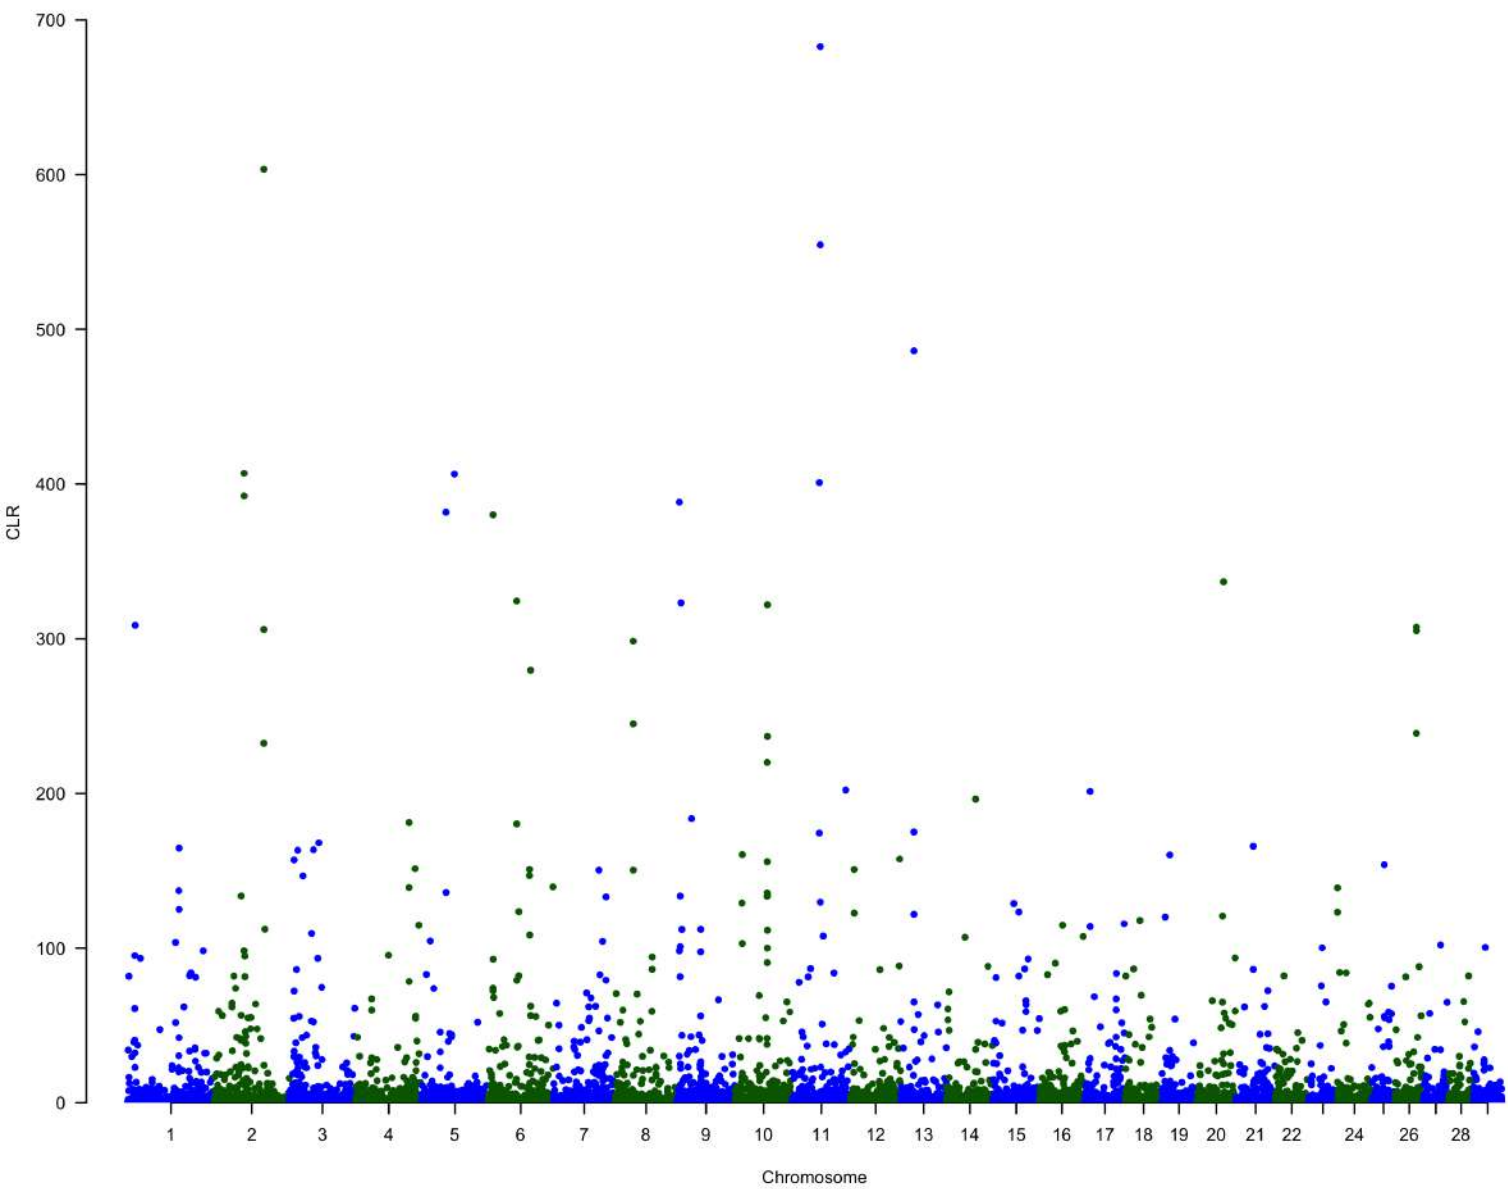

Caracu

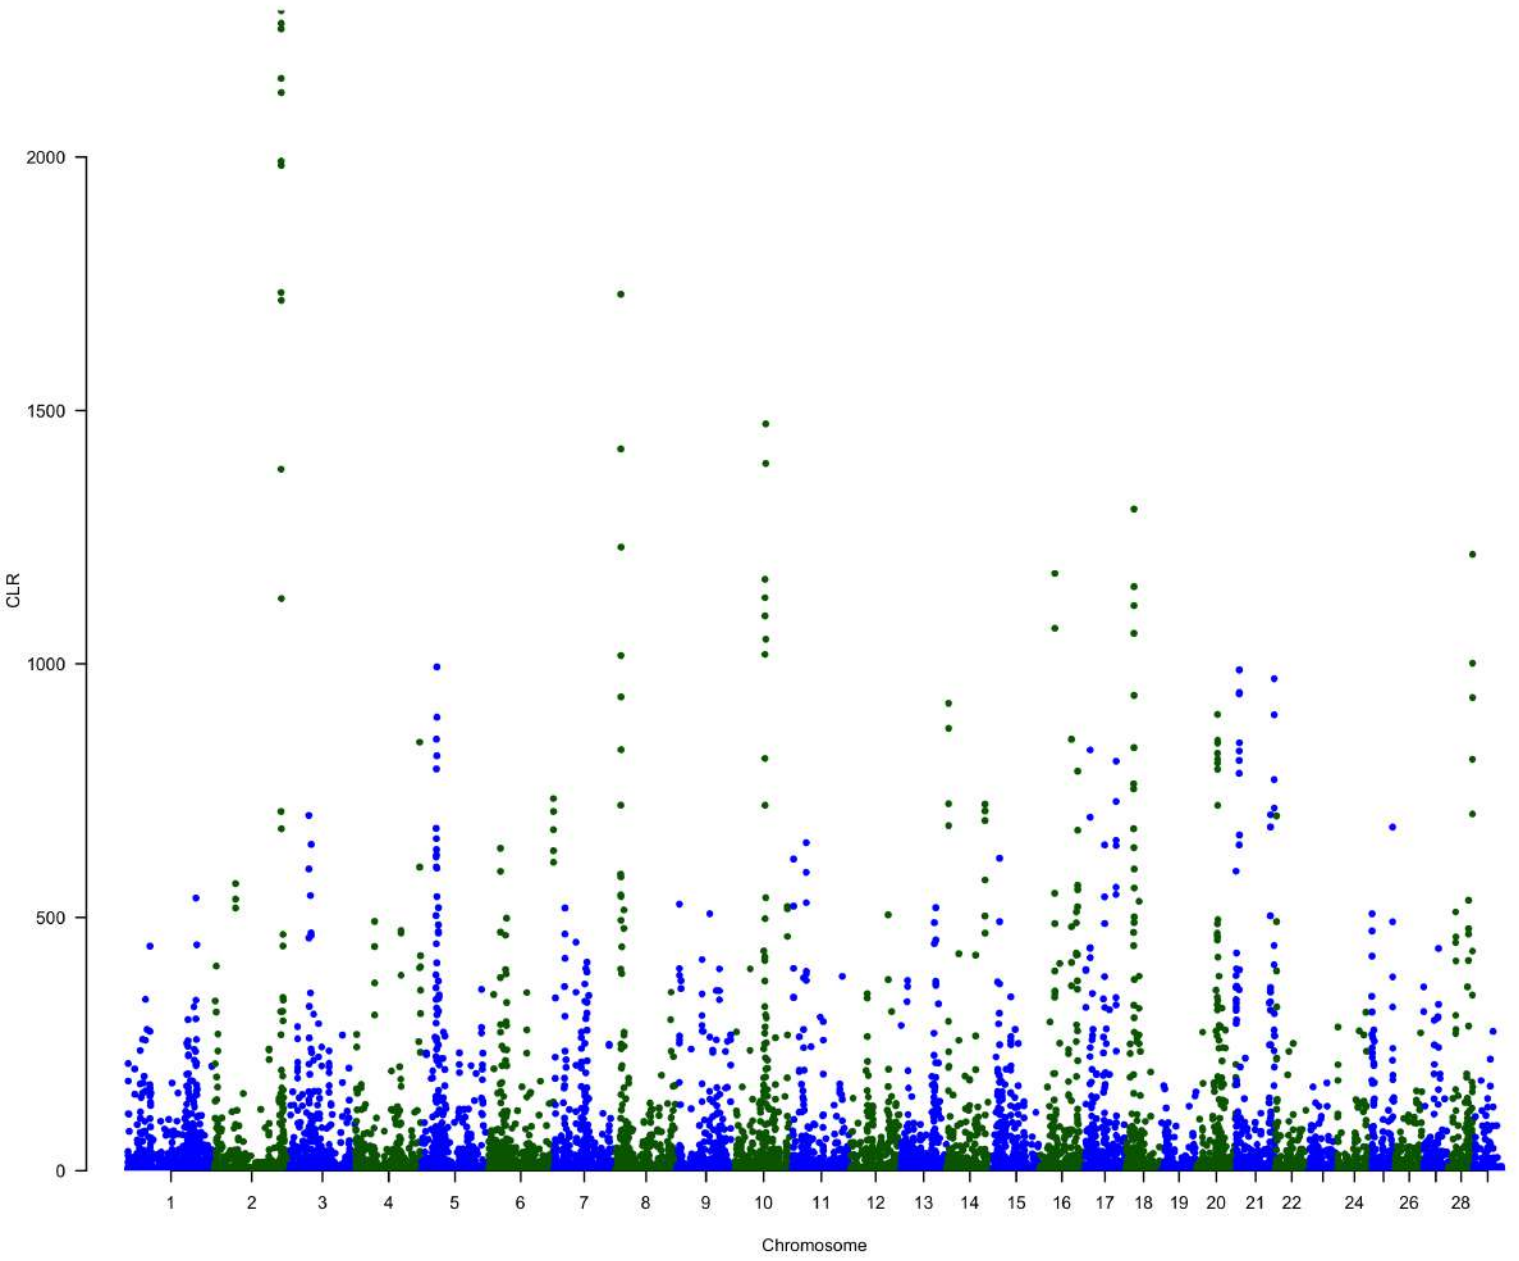

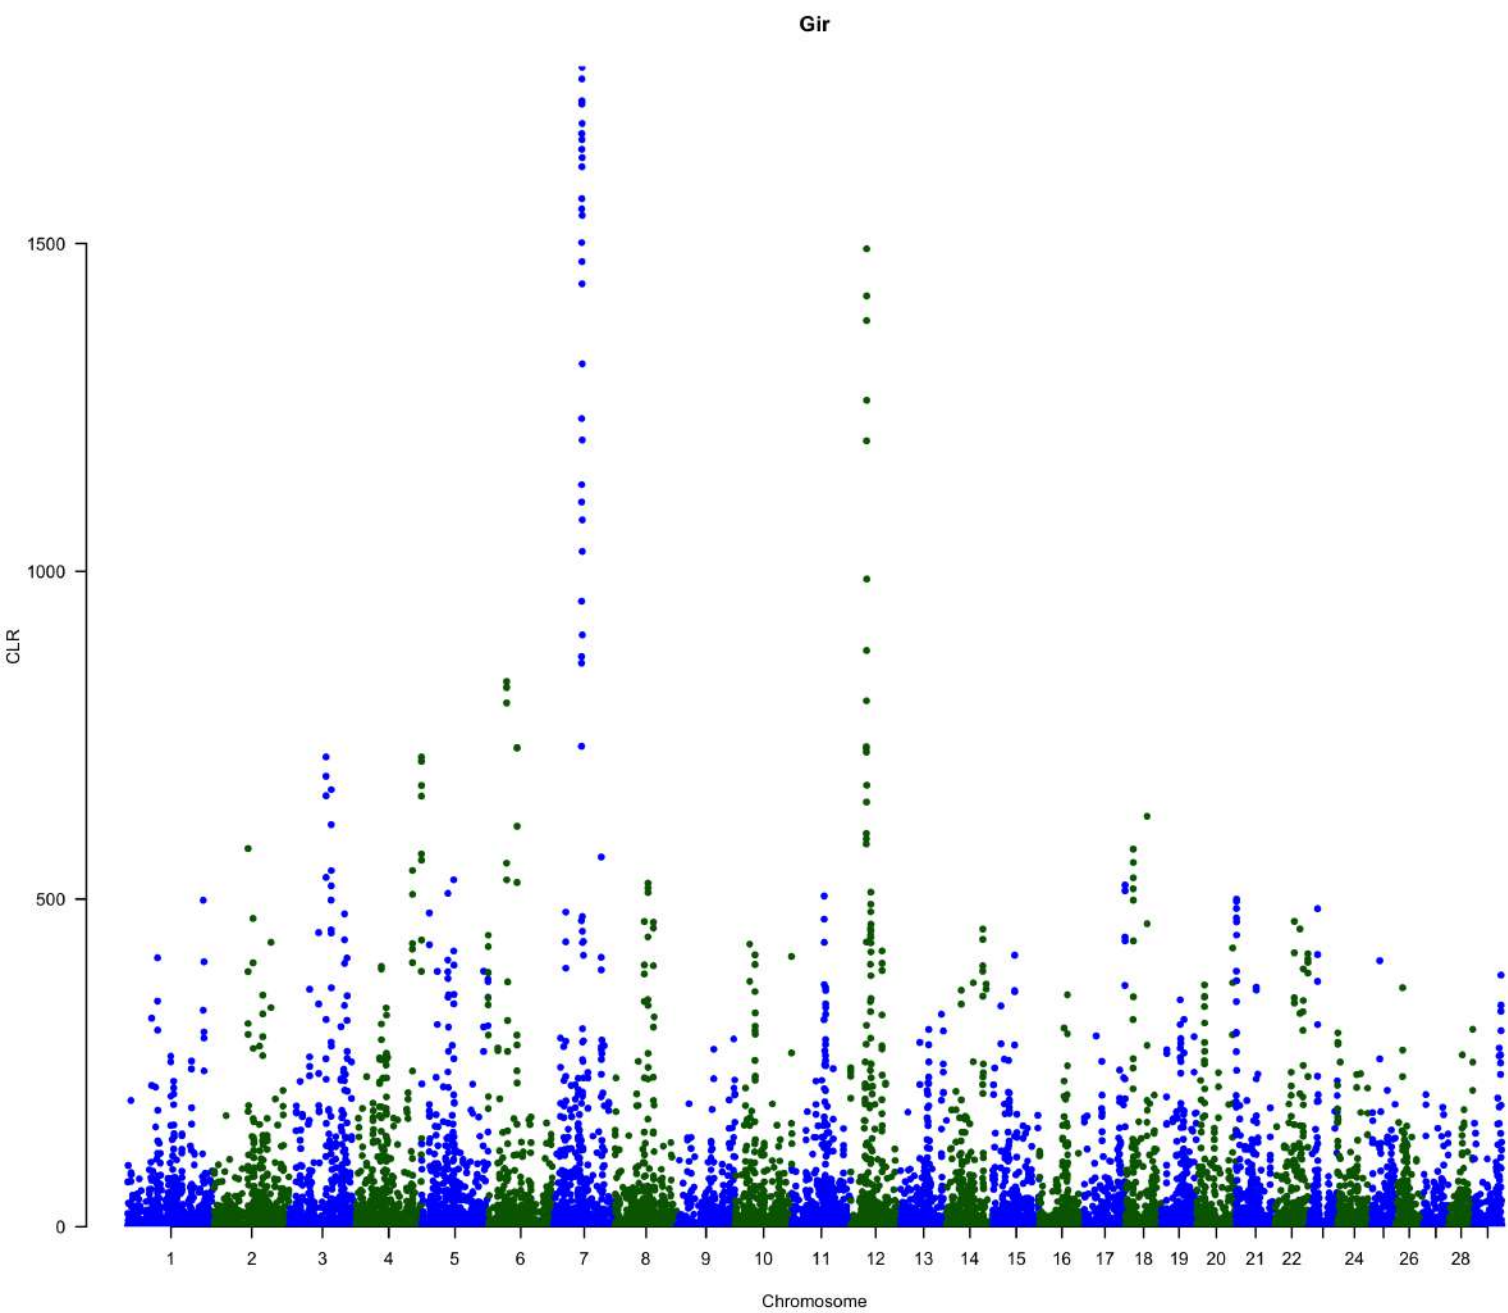

Gir and Caracu

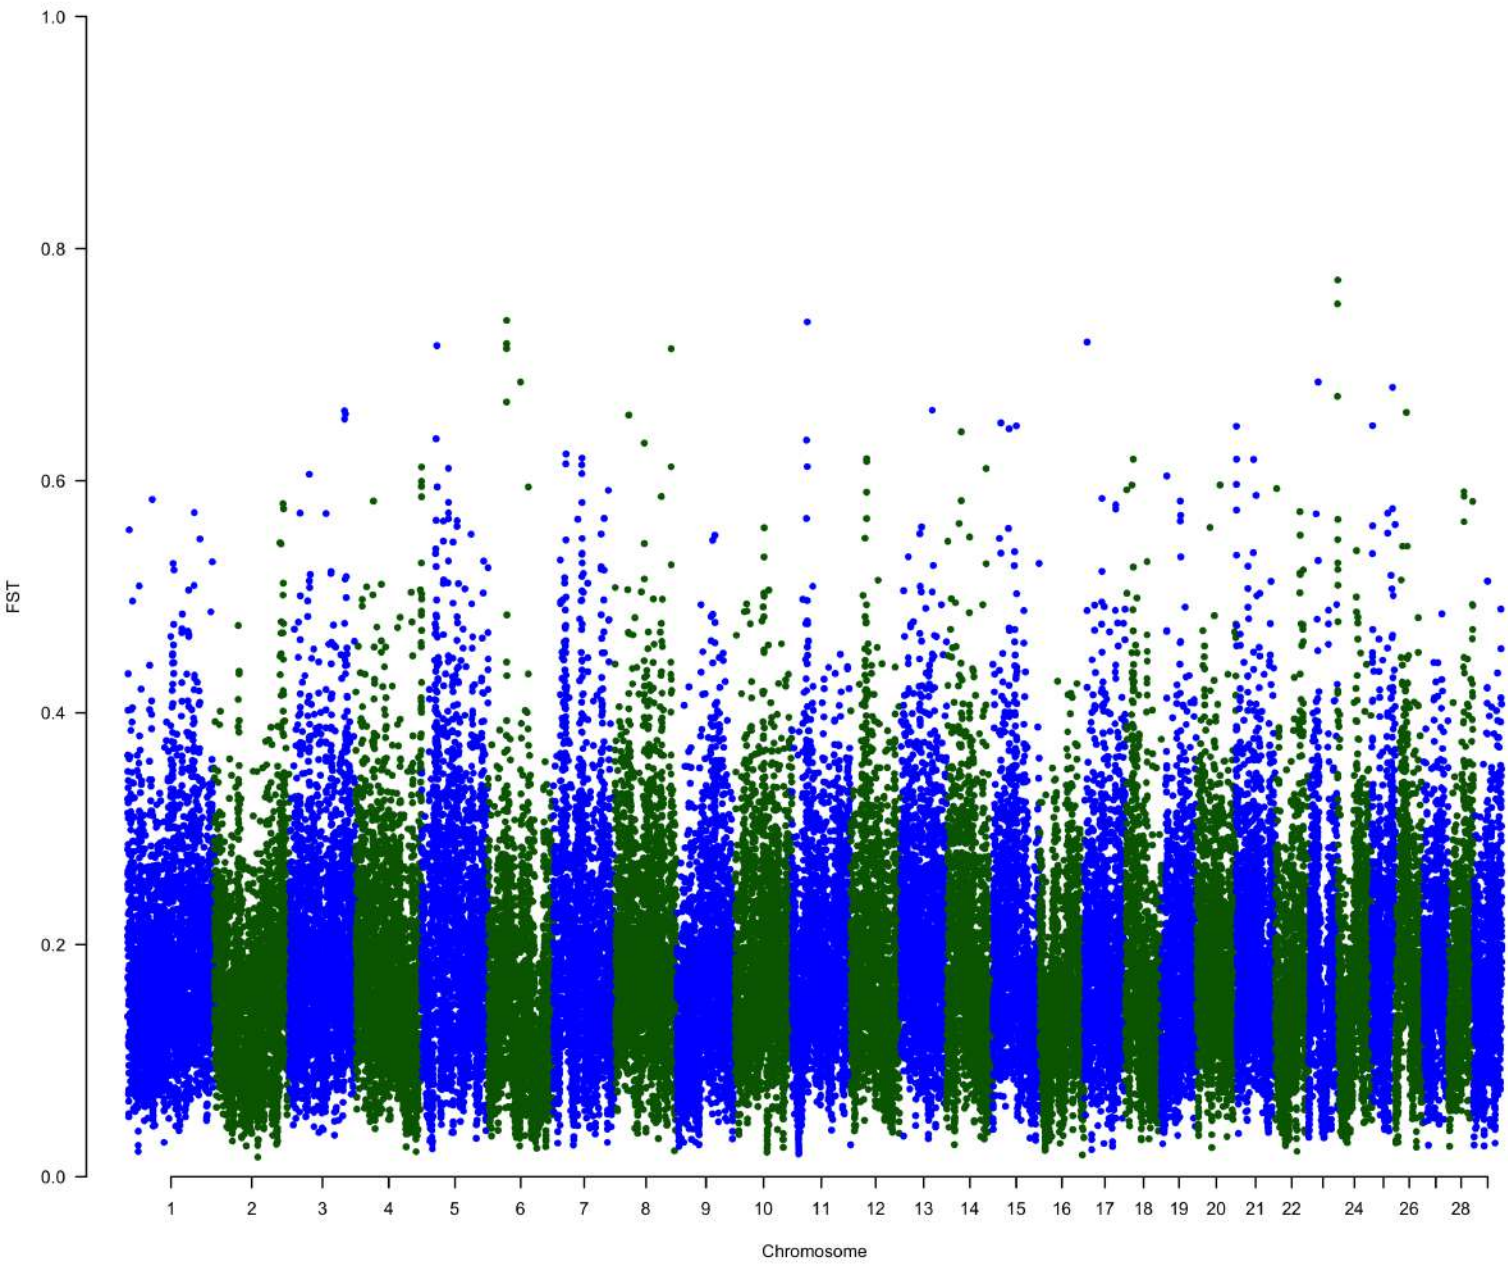

Gir and Crioulo

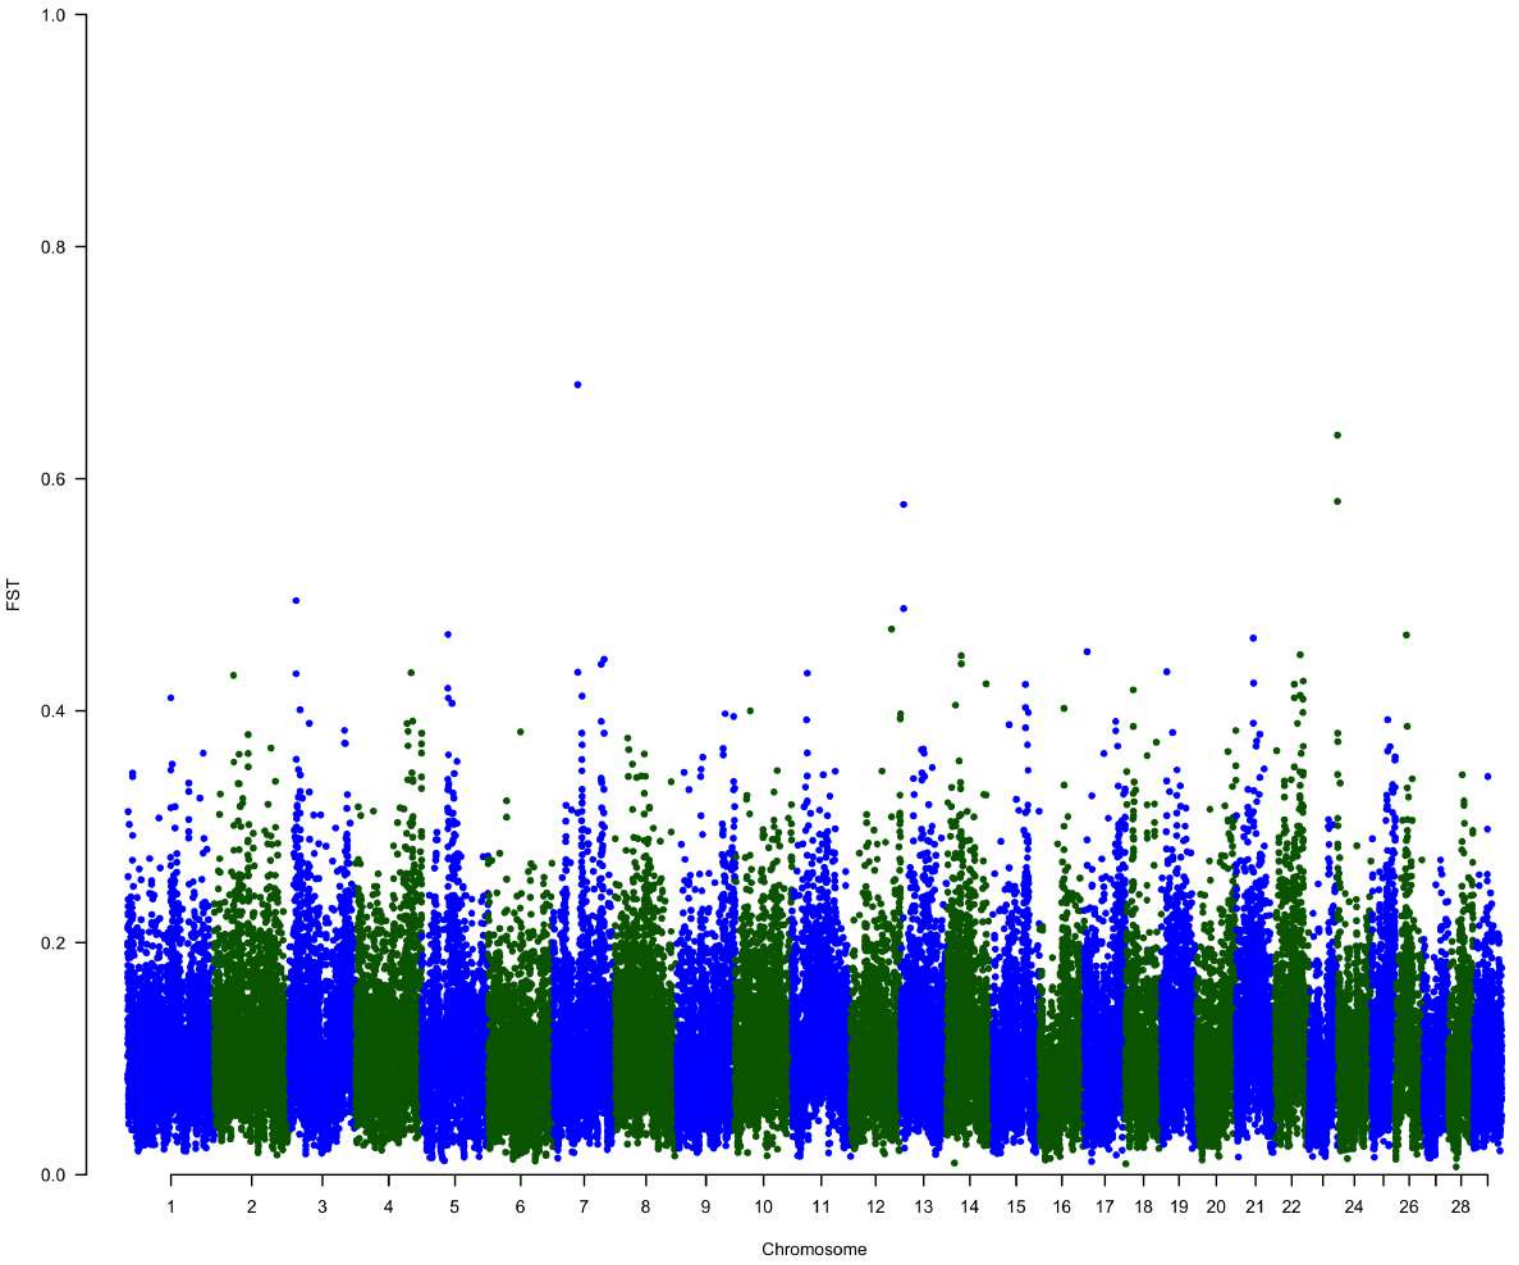

Gir and Pantaneiro

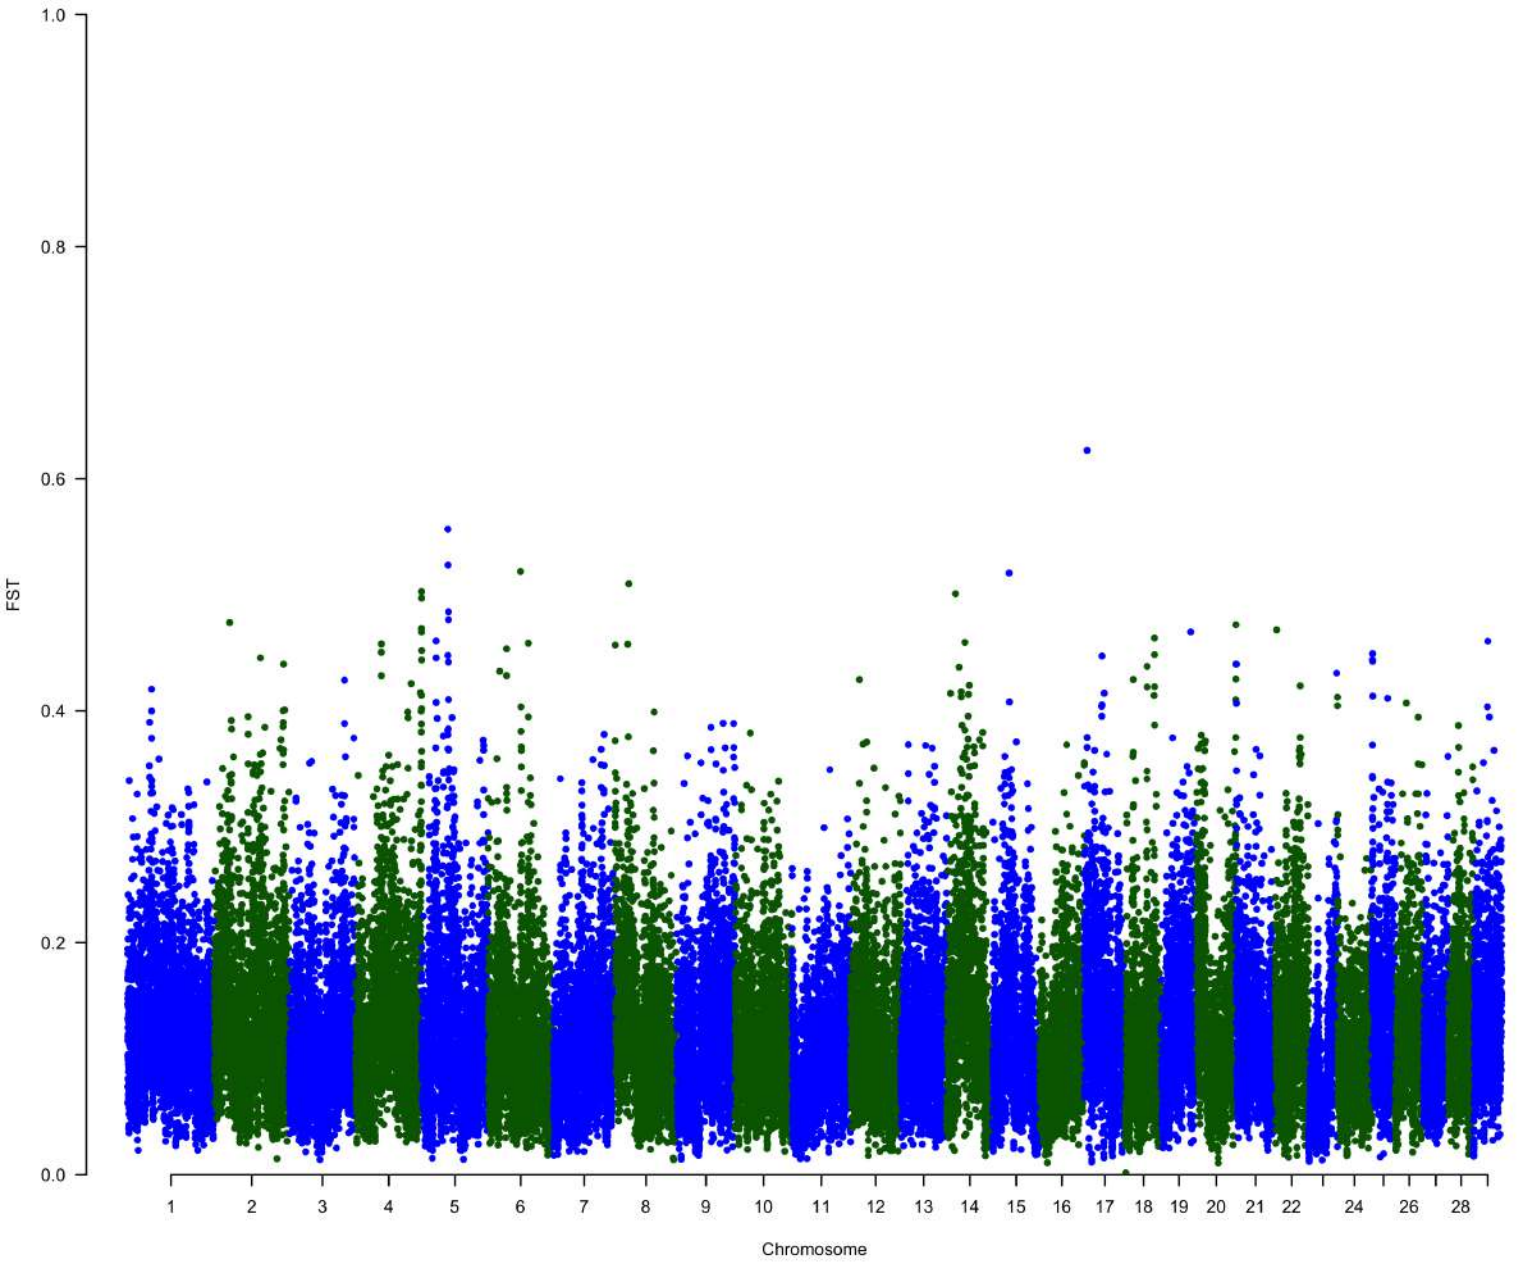

Pantaneiro and Caracu

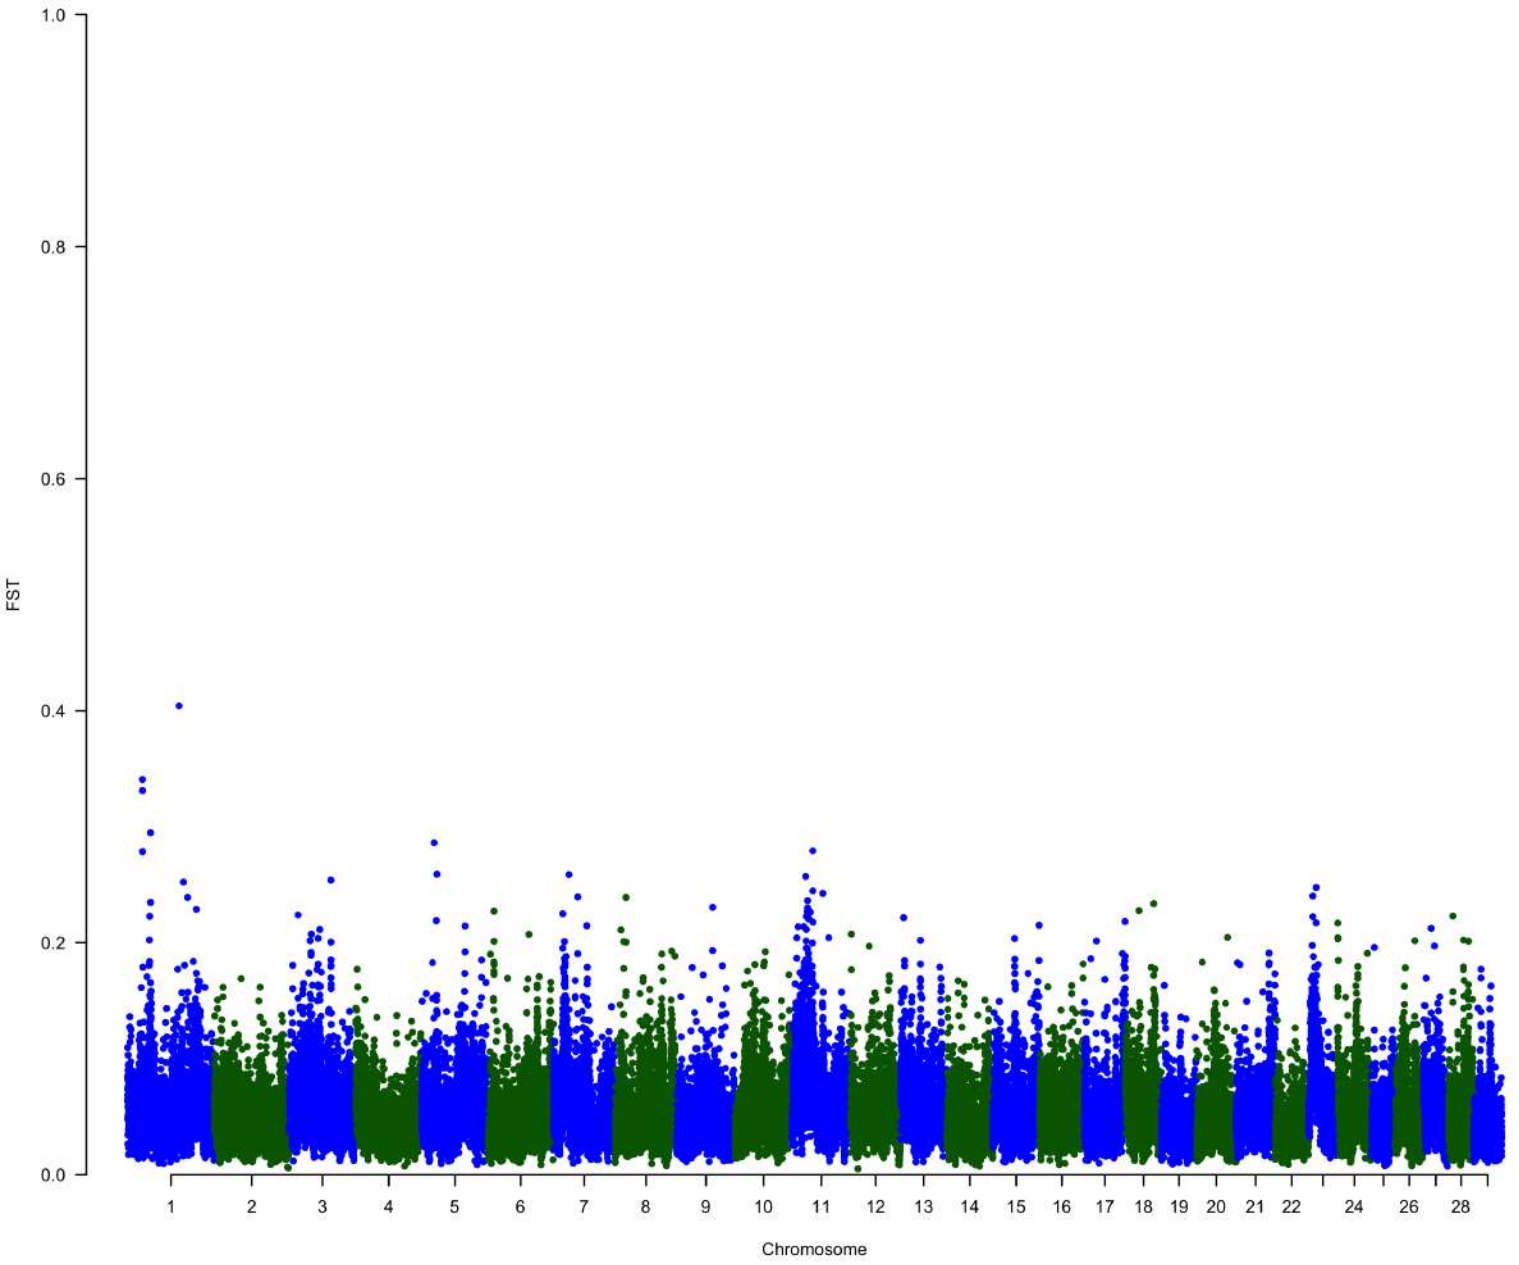



Crioulo and Caracu

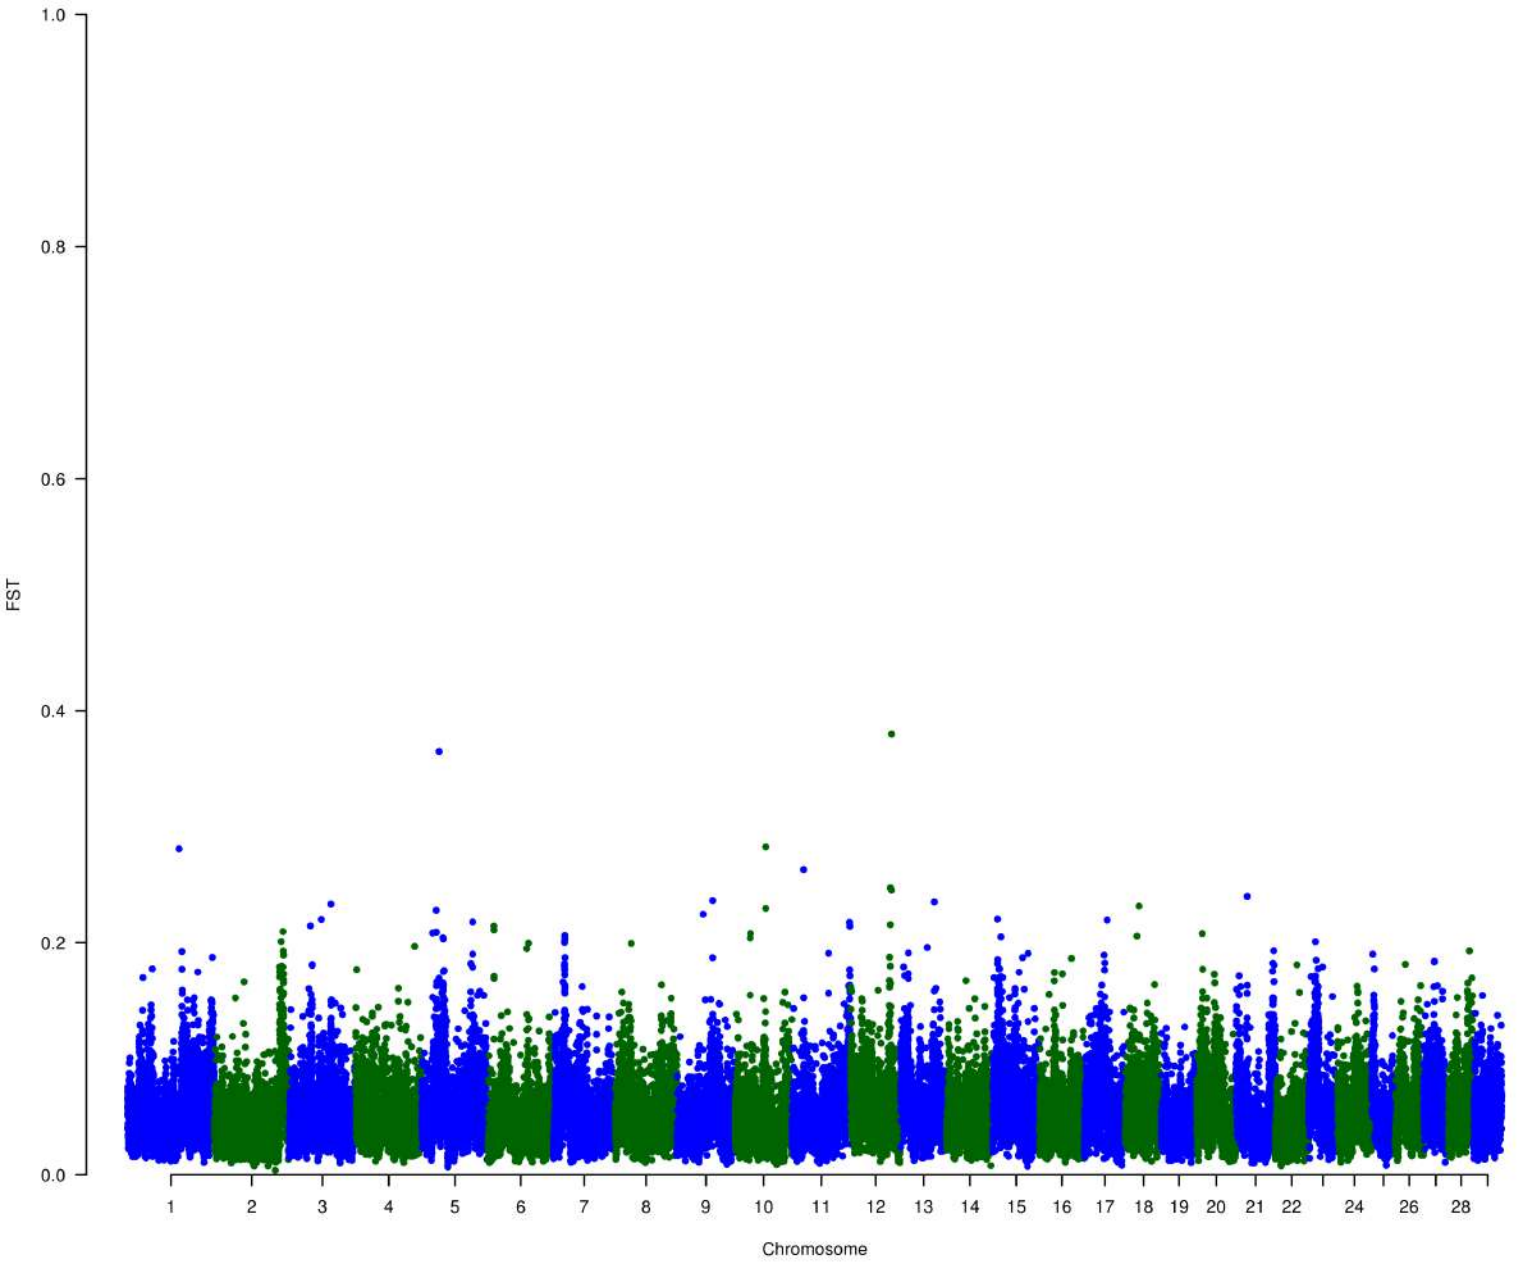

Crioulo and Pantaneiro

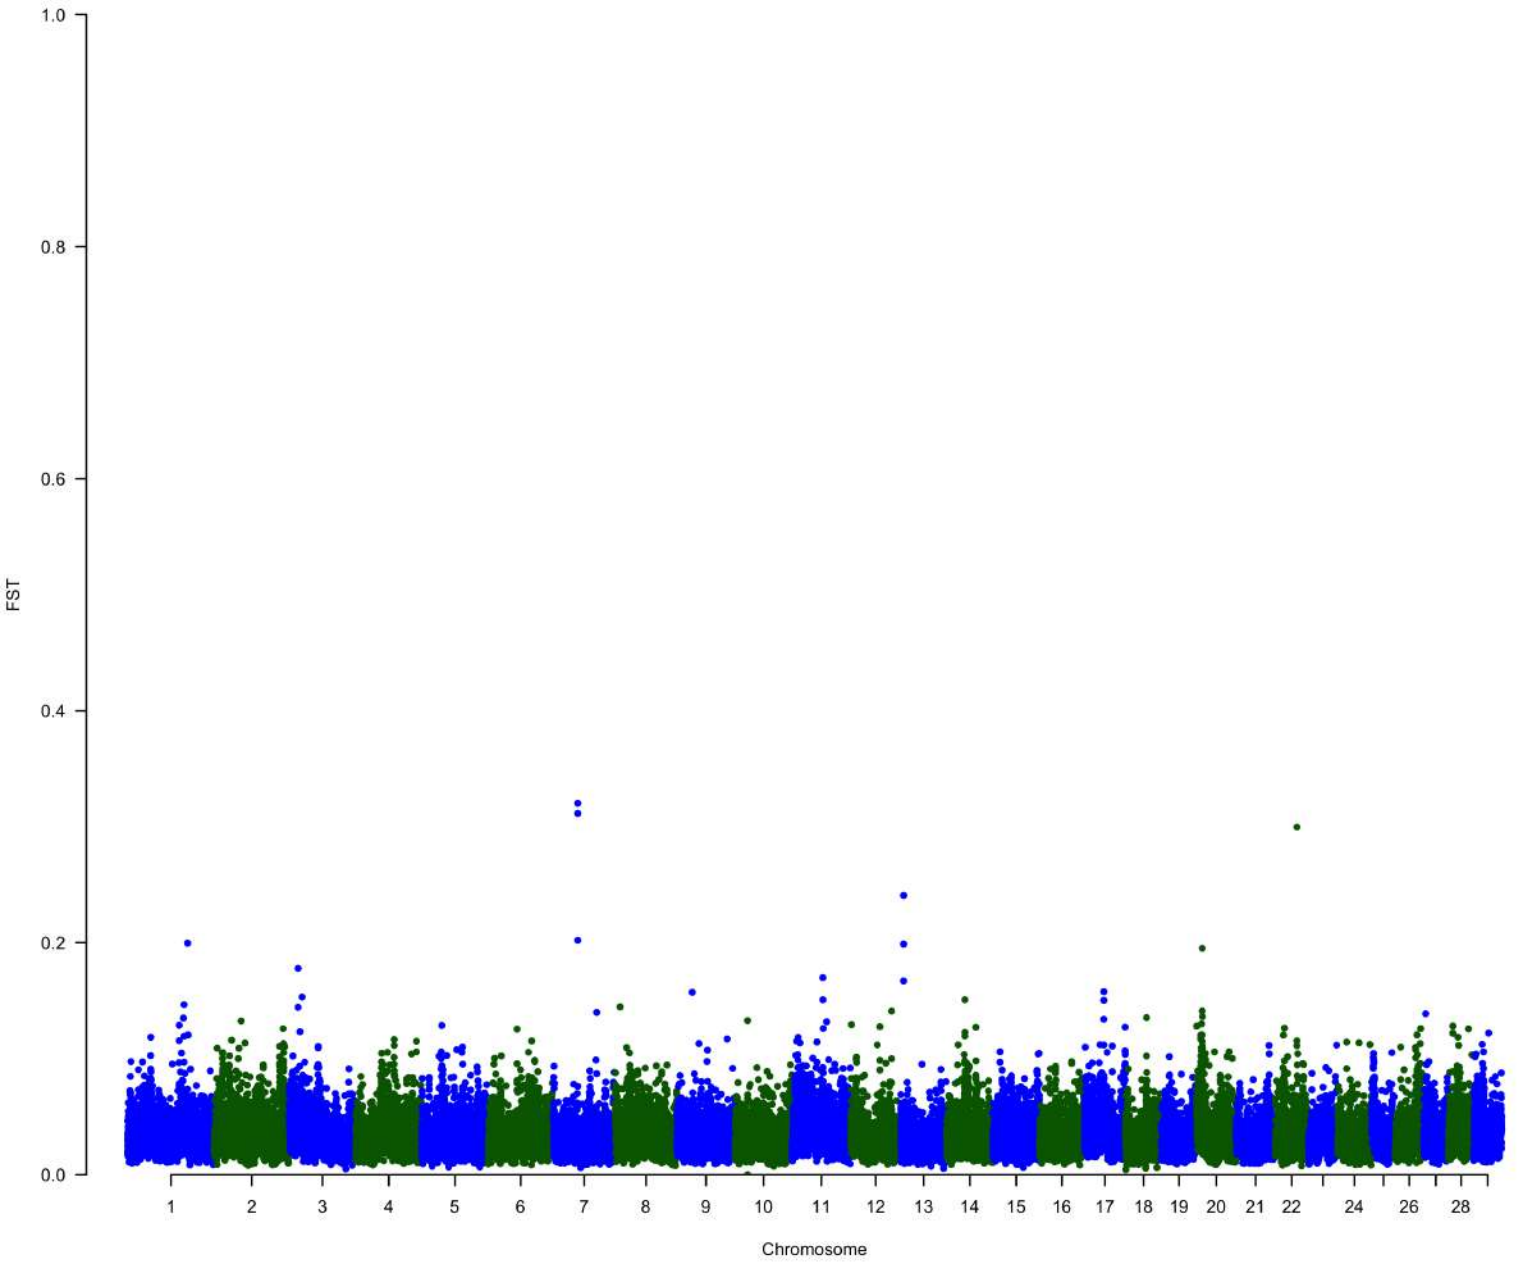

Pantaneiro

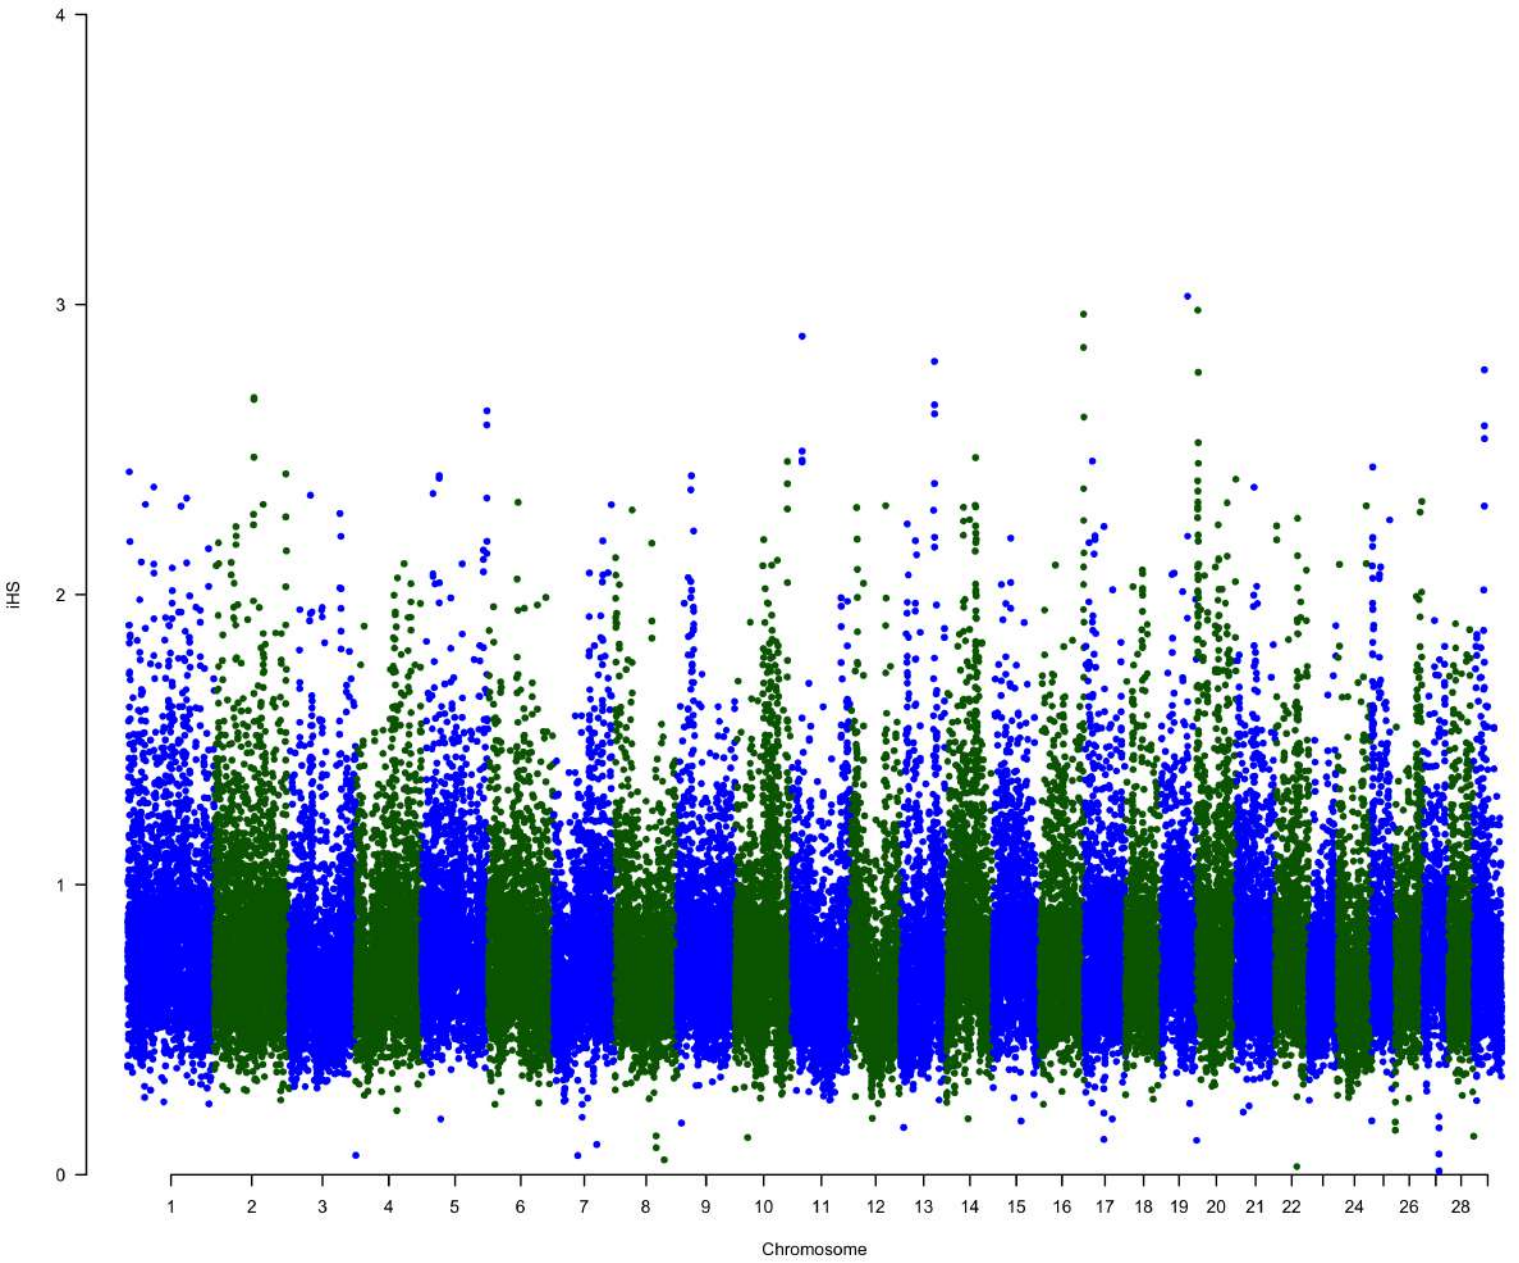

Crioulo

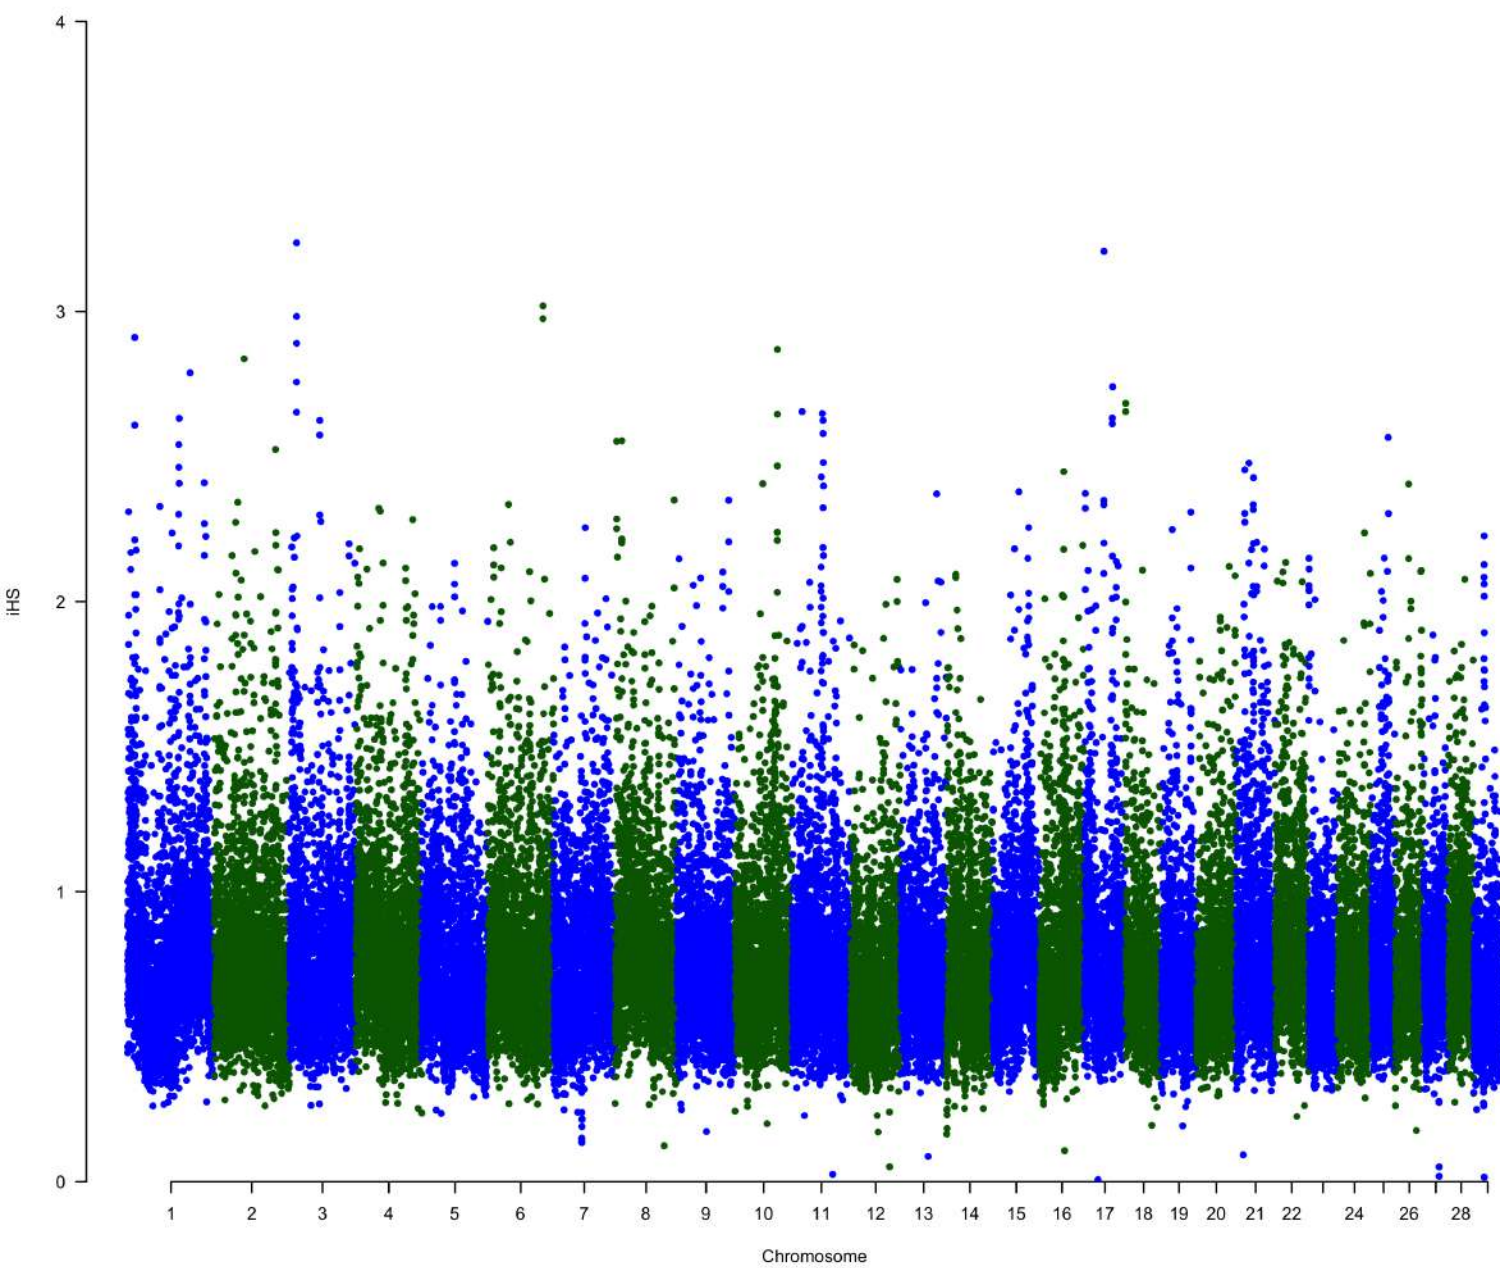

Caracu

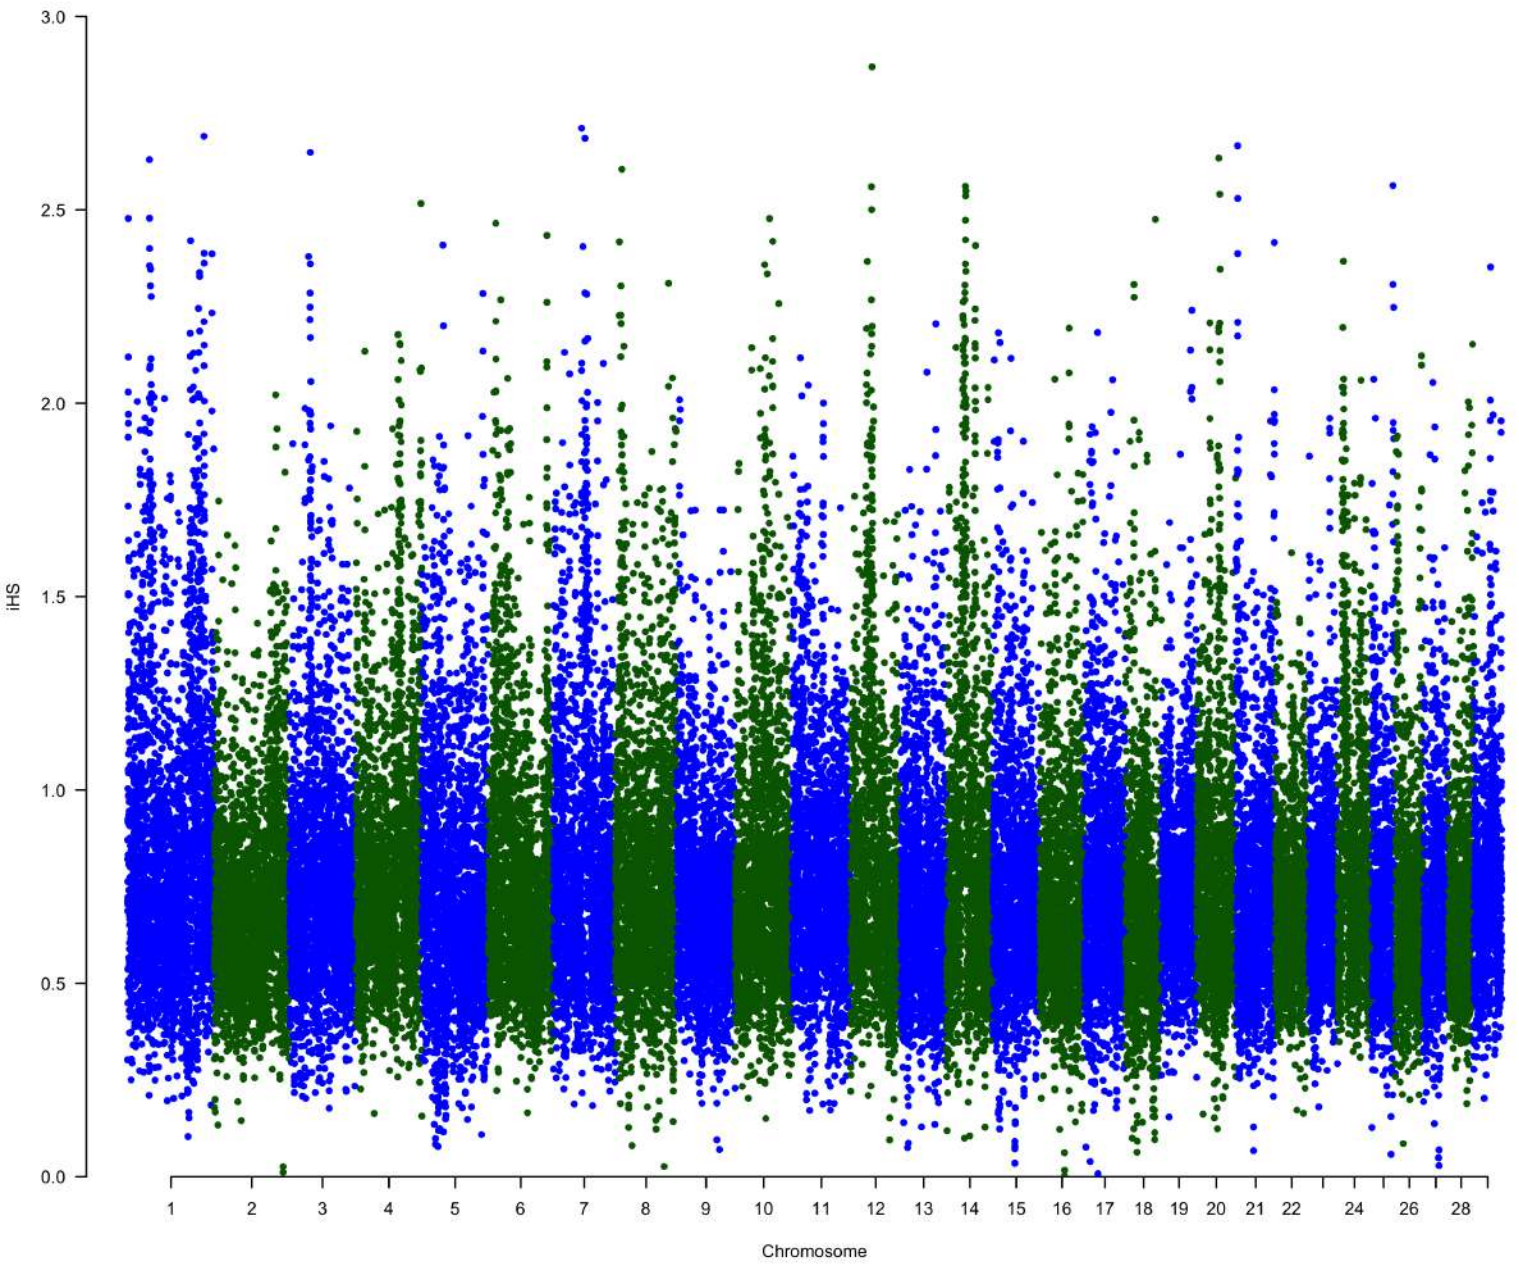

Gir

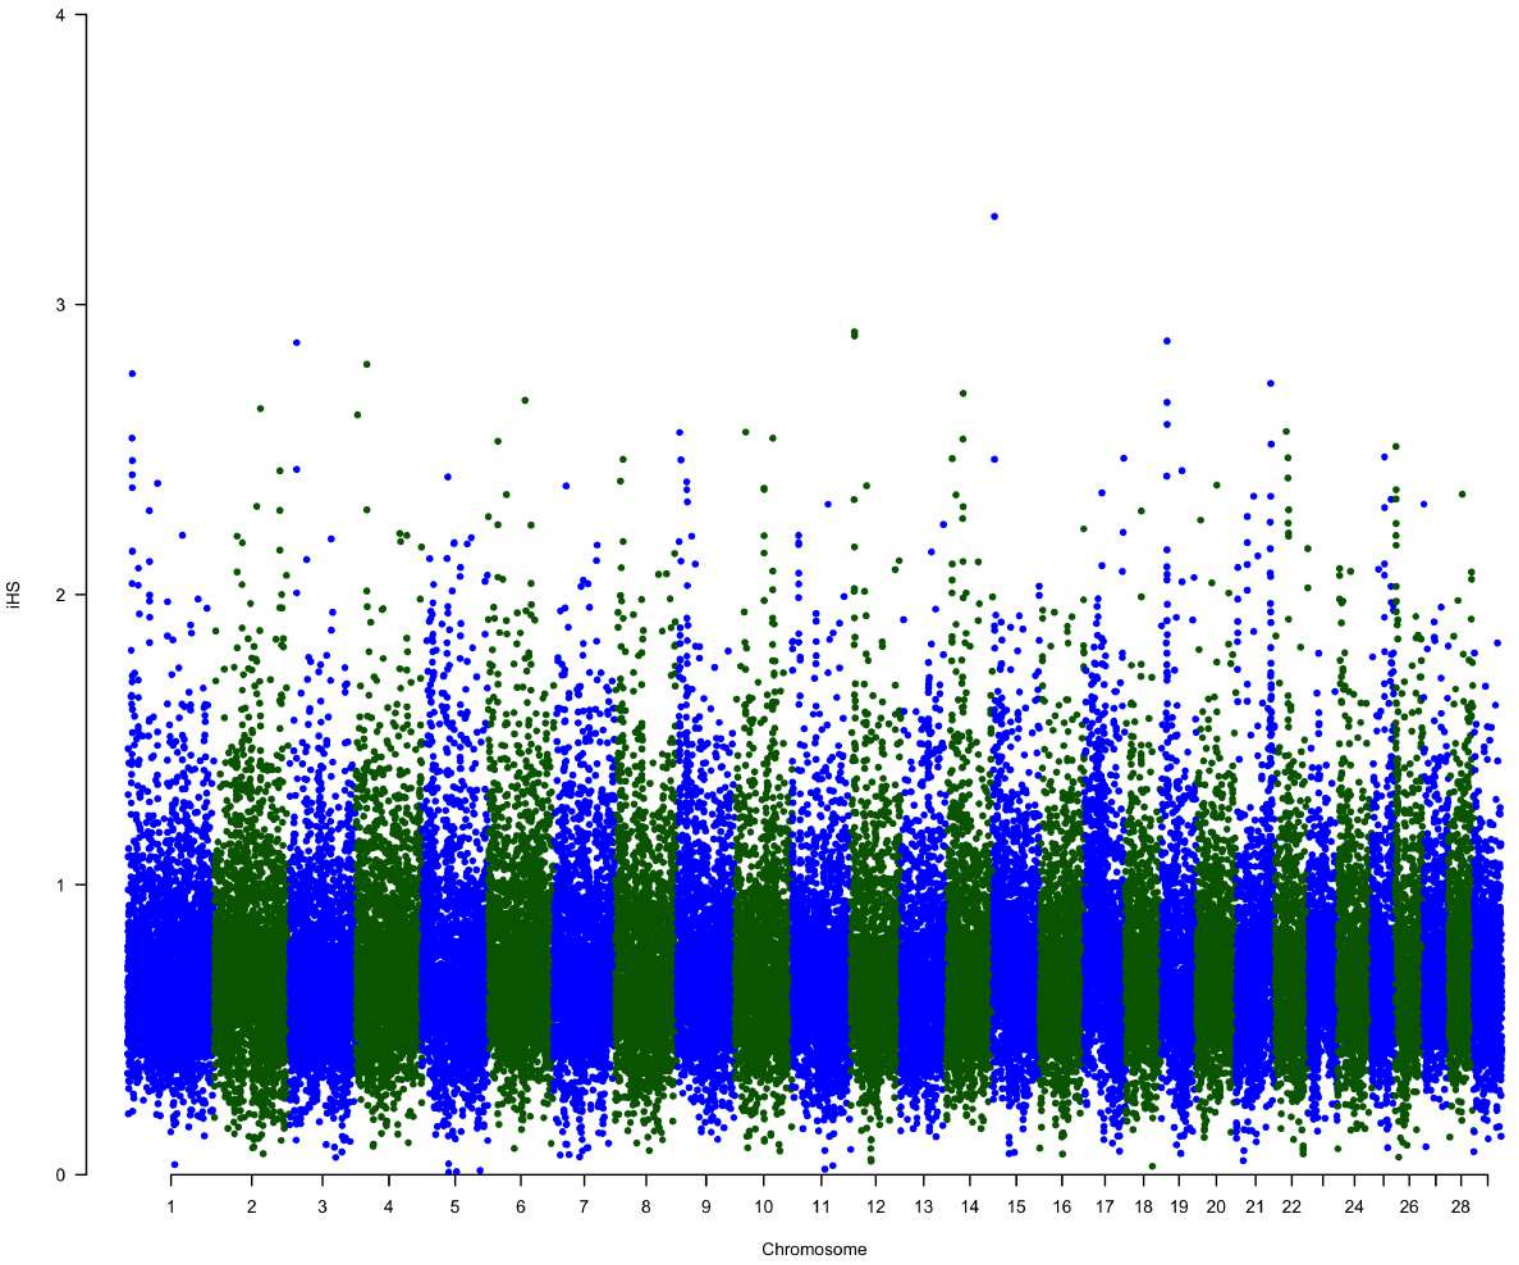

Gir and Pantaneiro

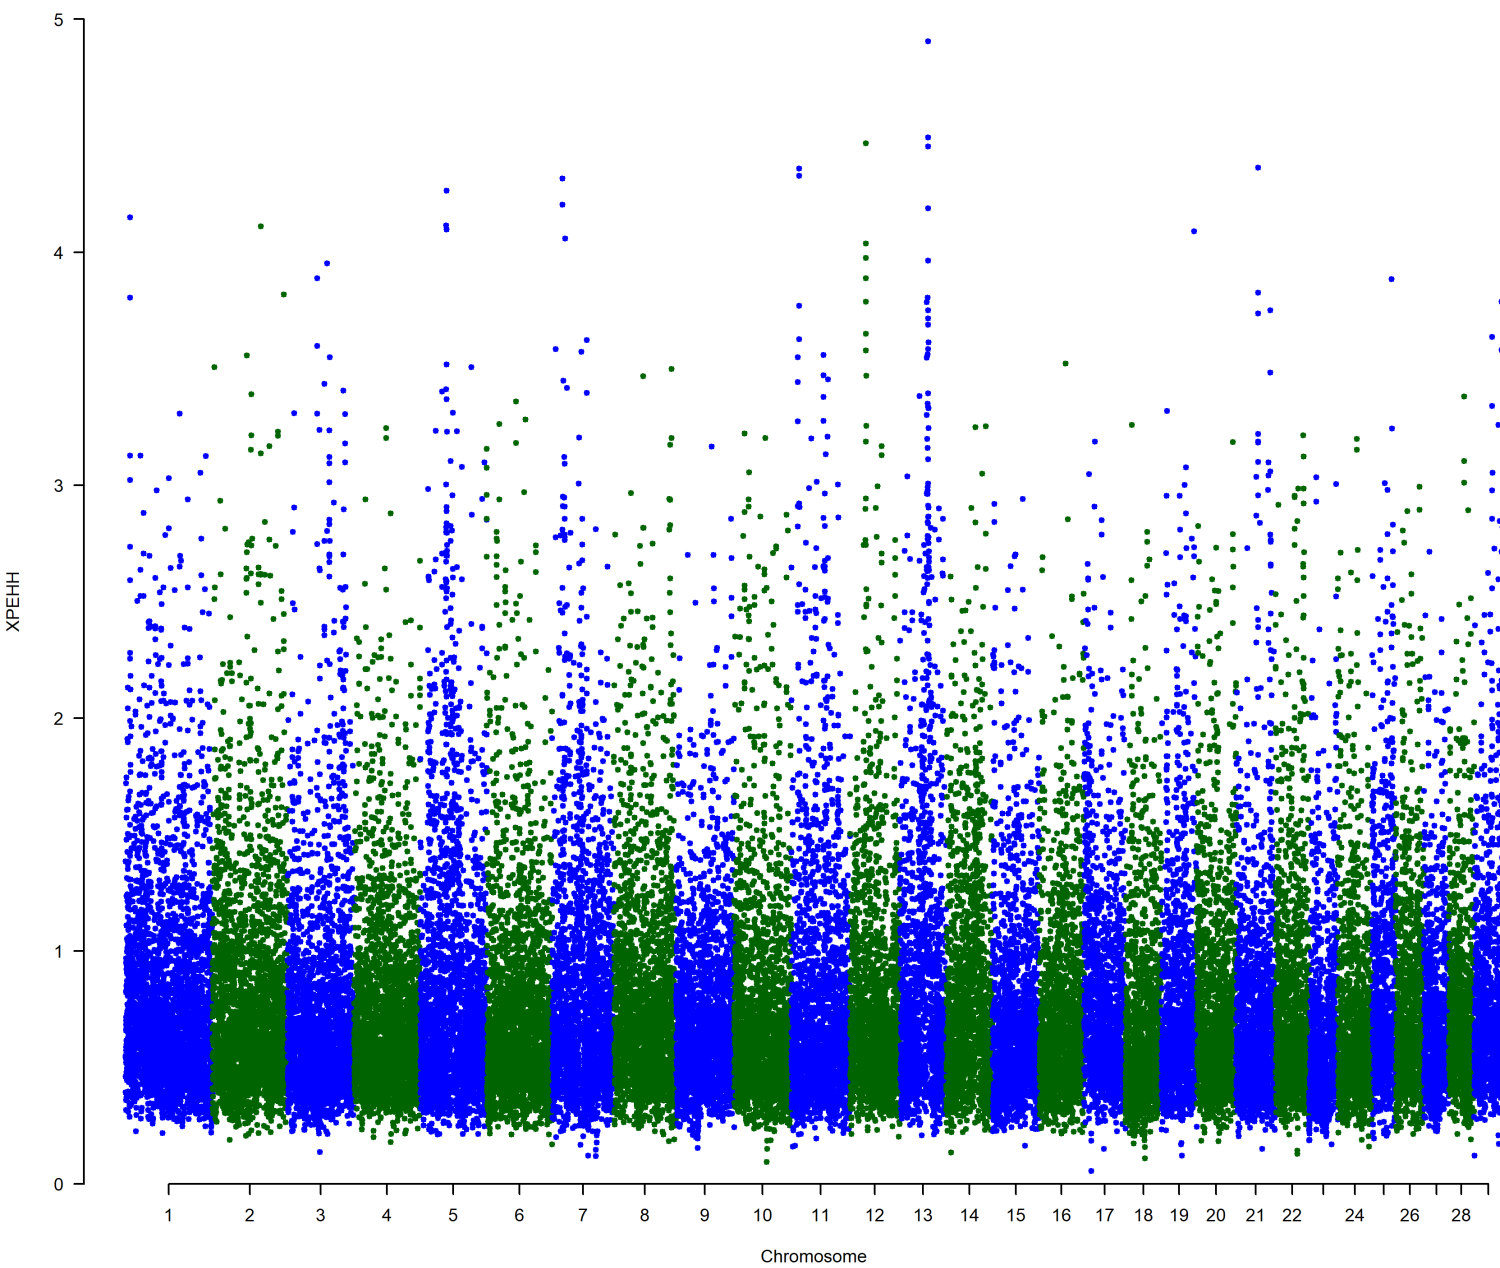

Gir and Caracu

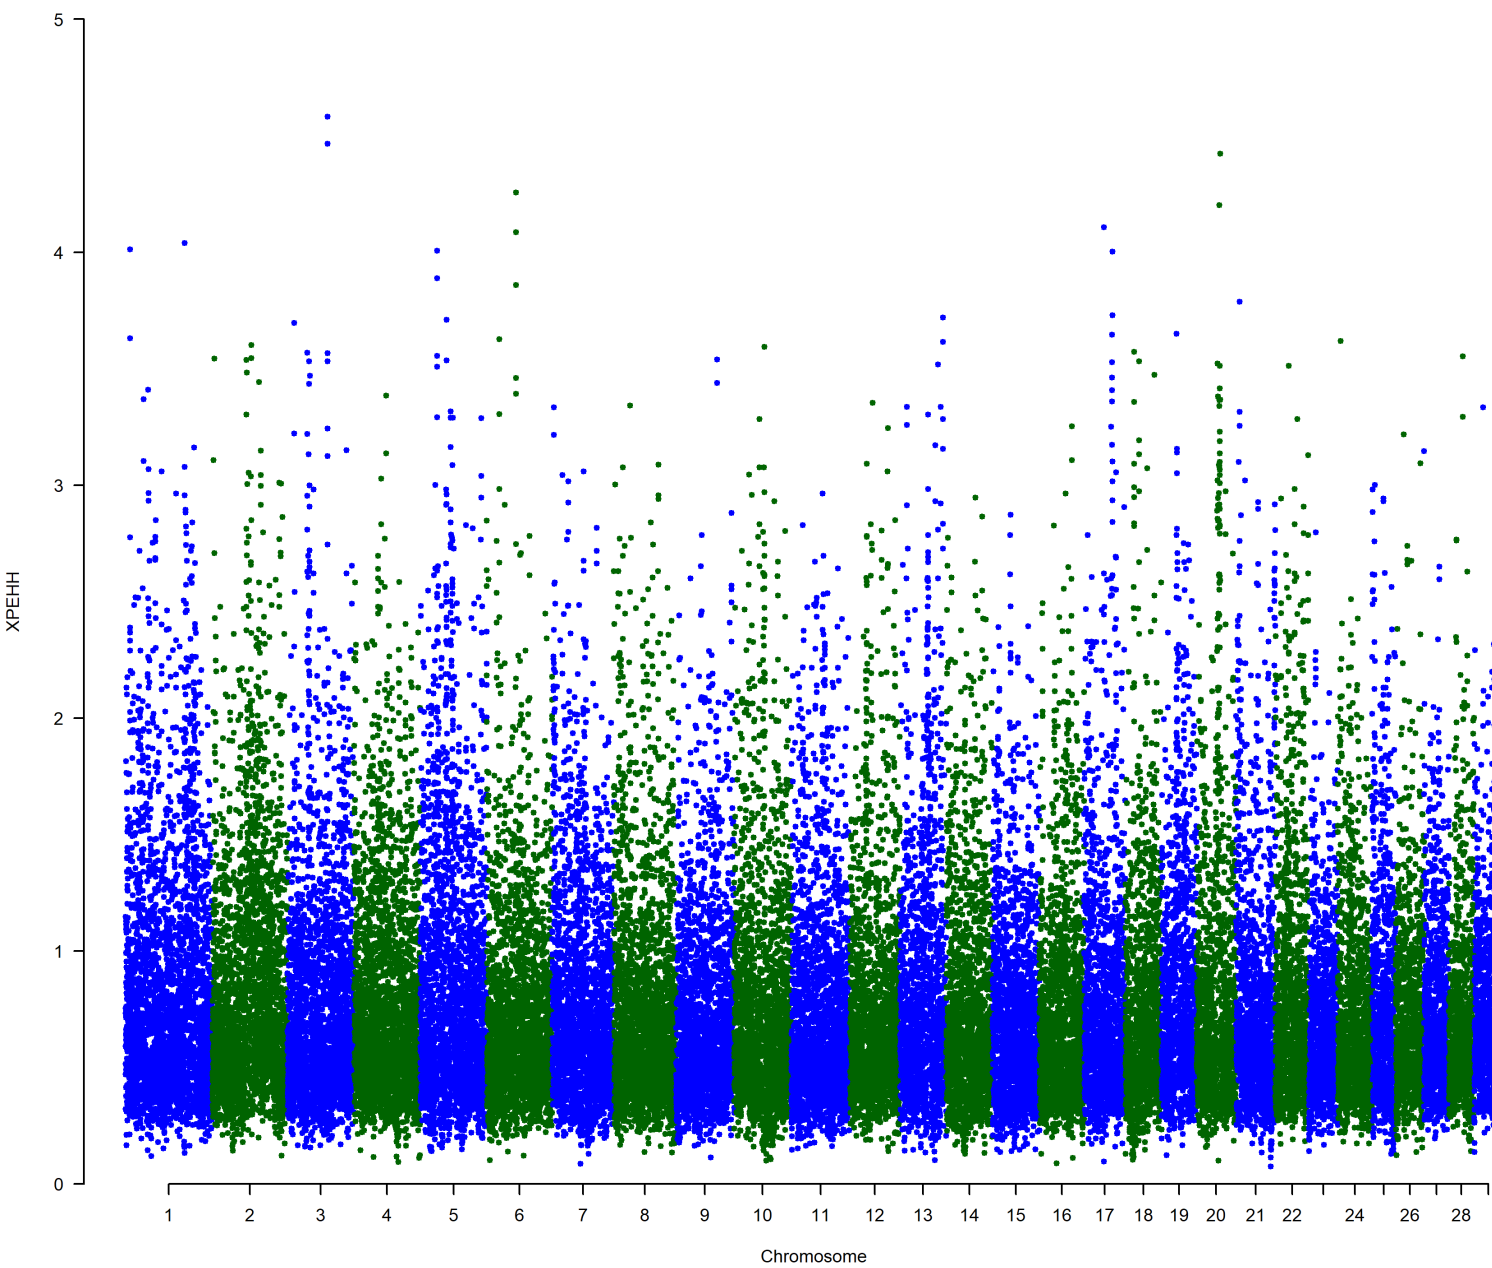



### Gir and Crioulo

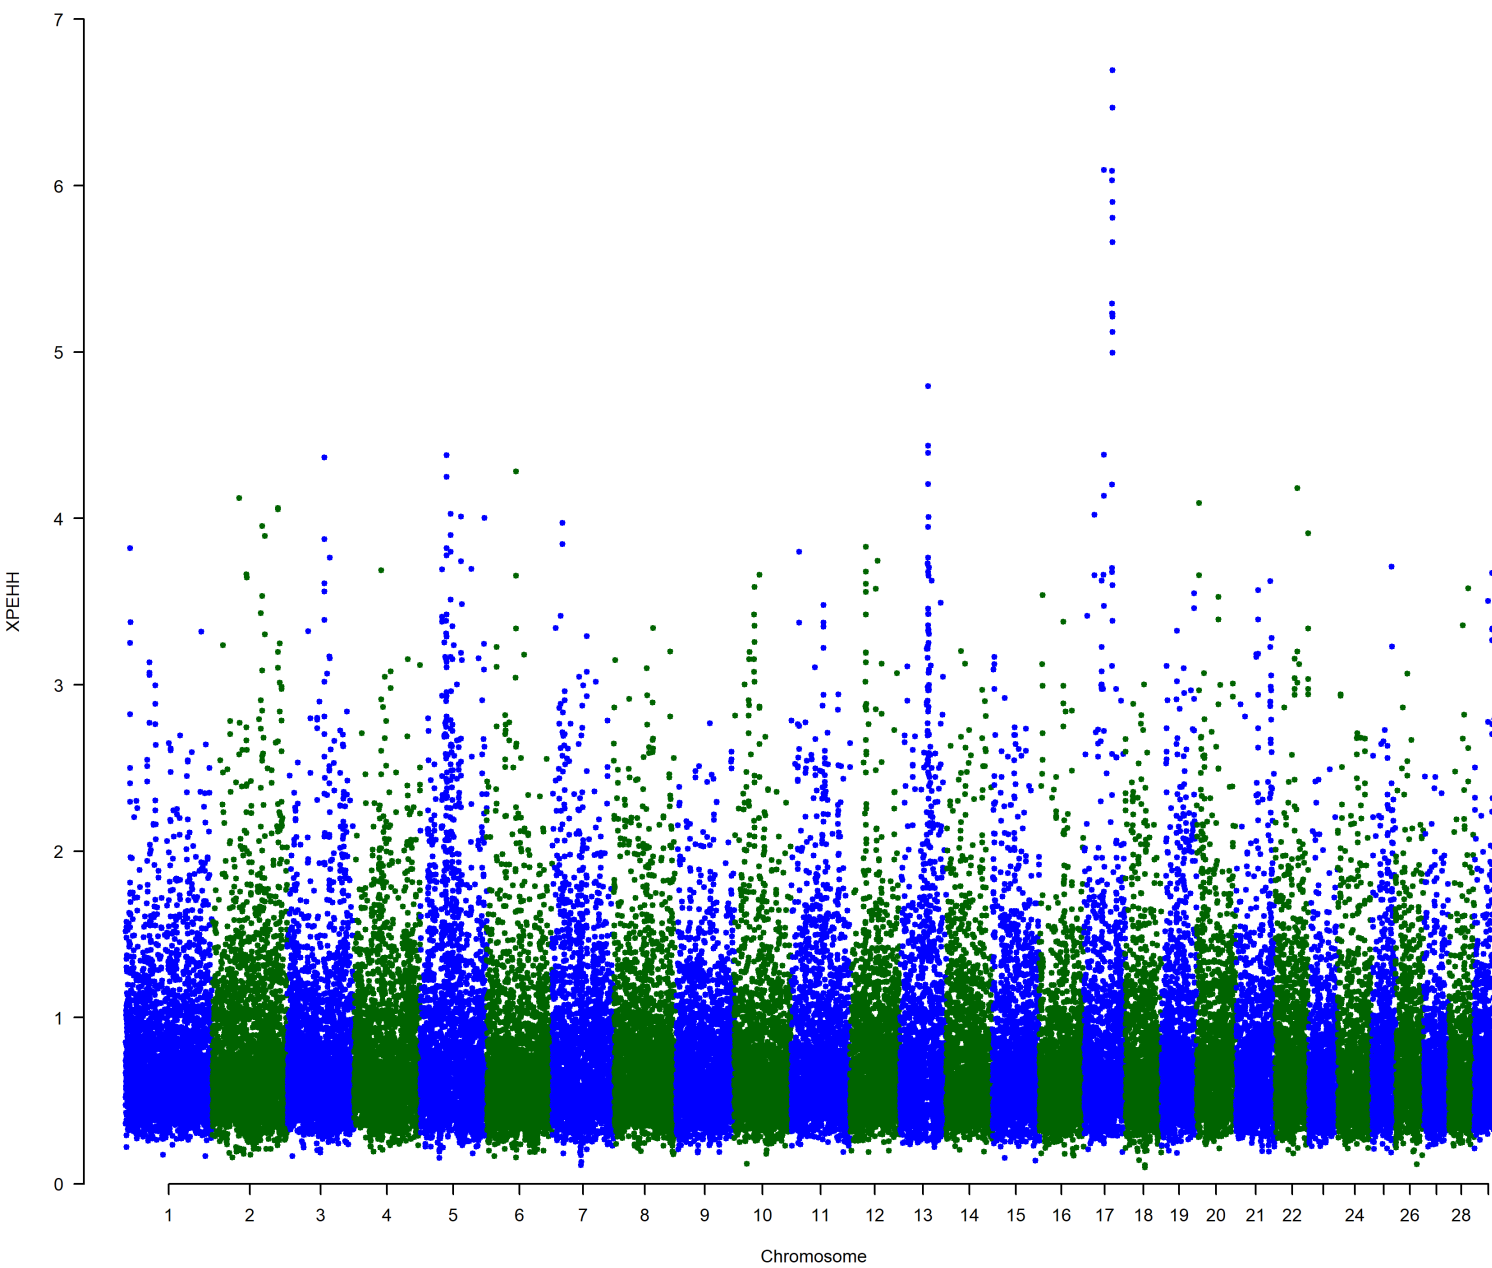

Pantaneiro and Caracu

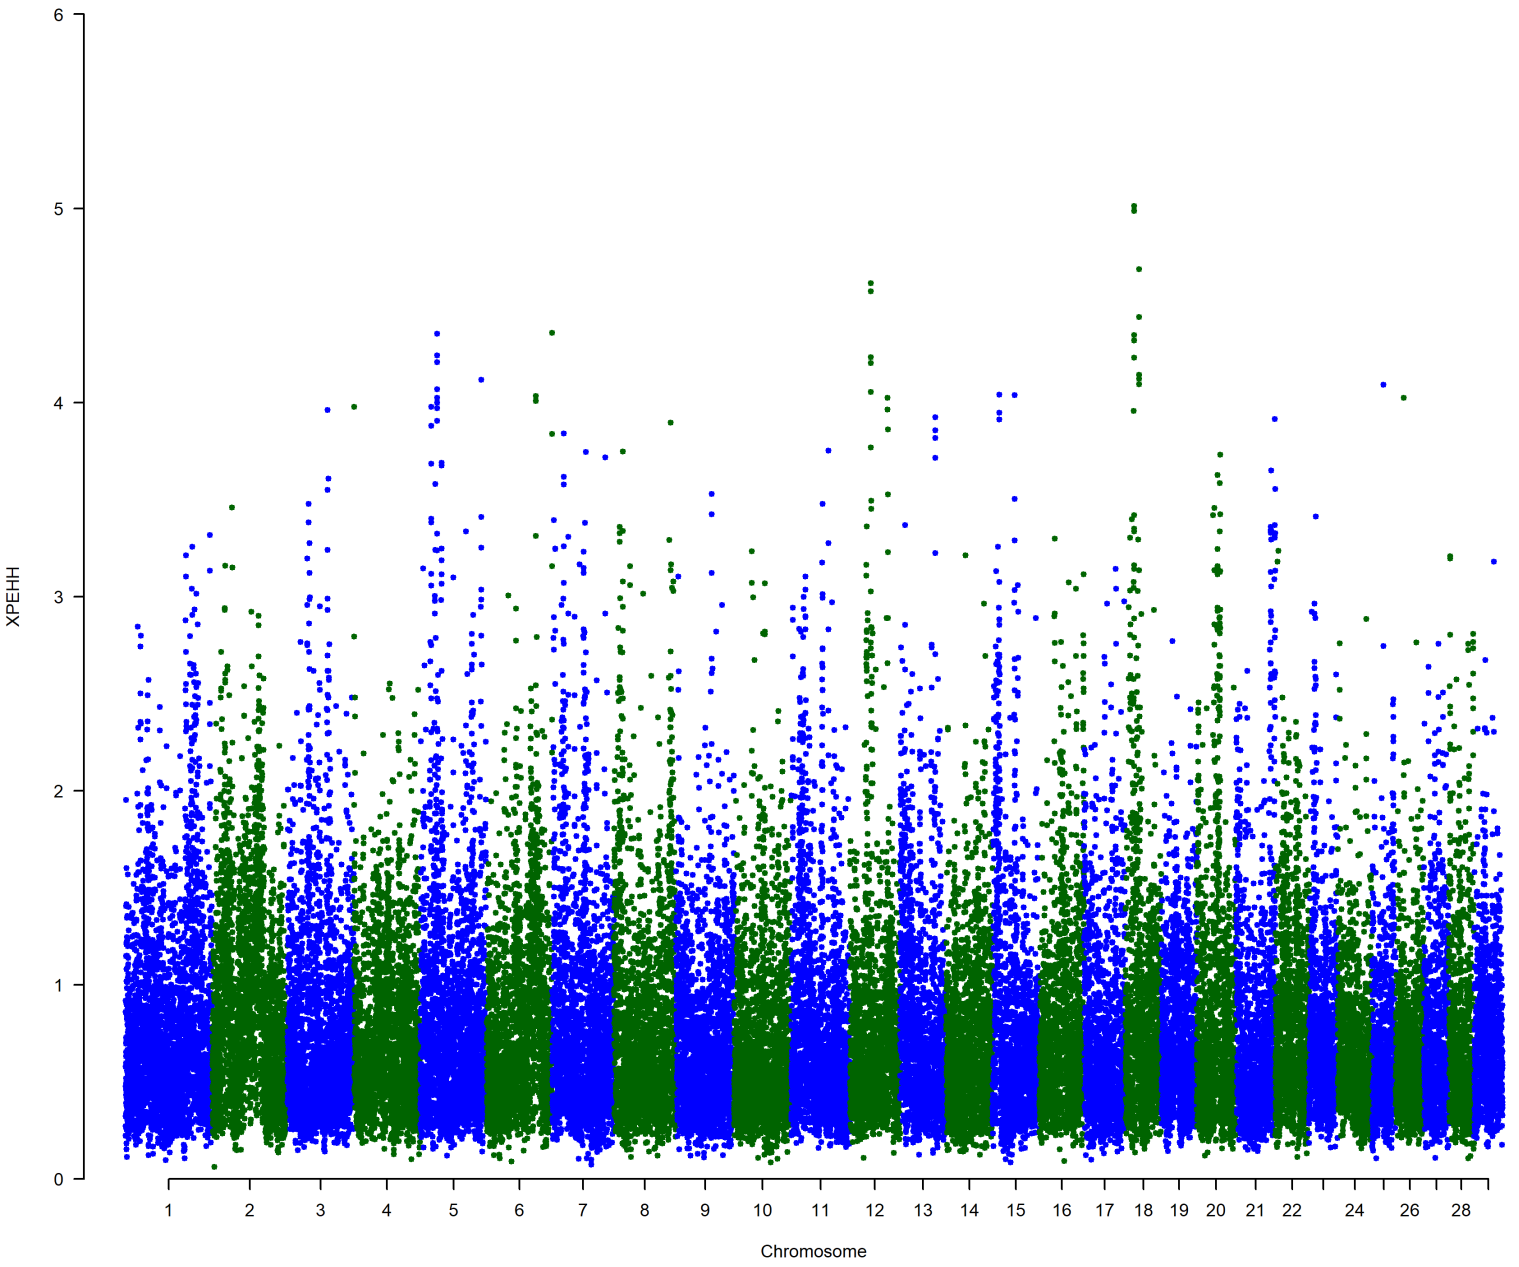

Crioulo and Pantaneiro

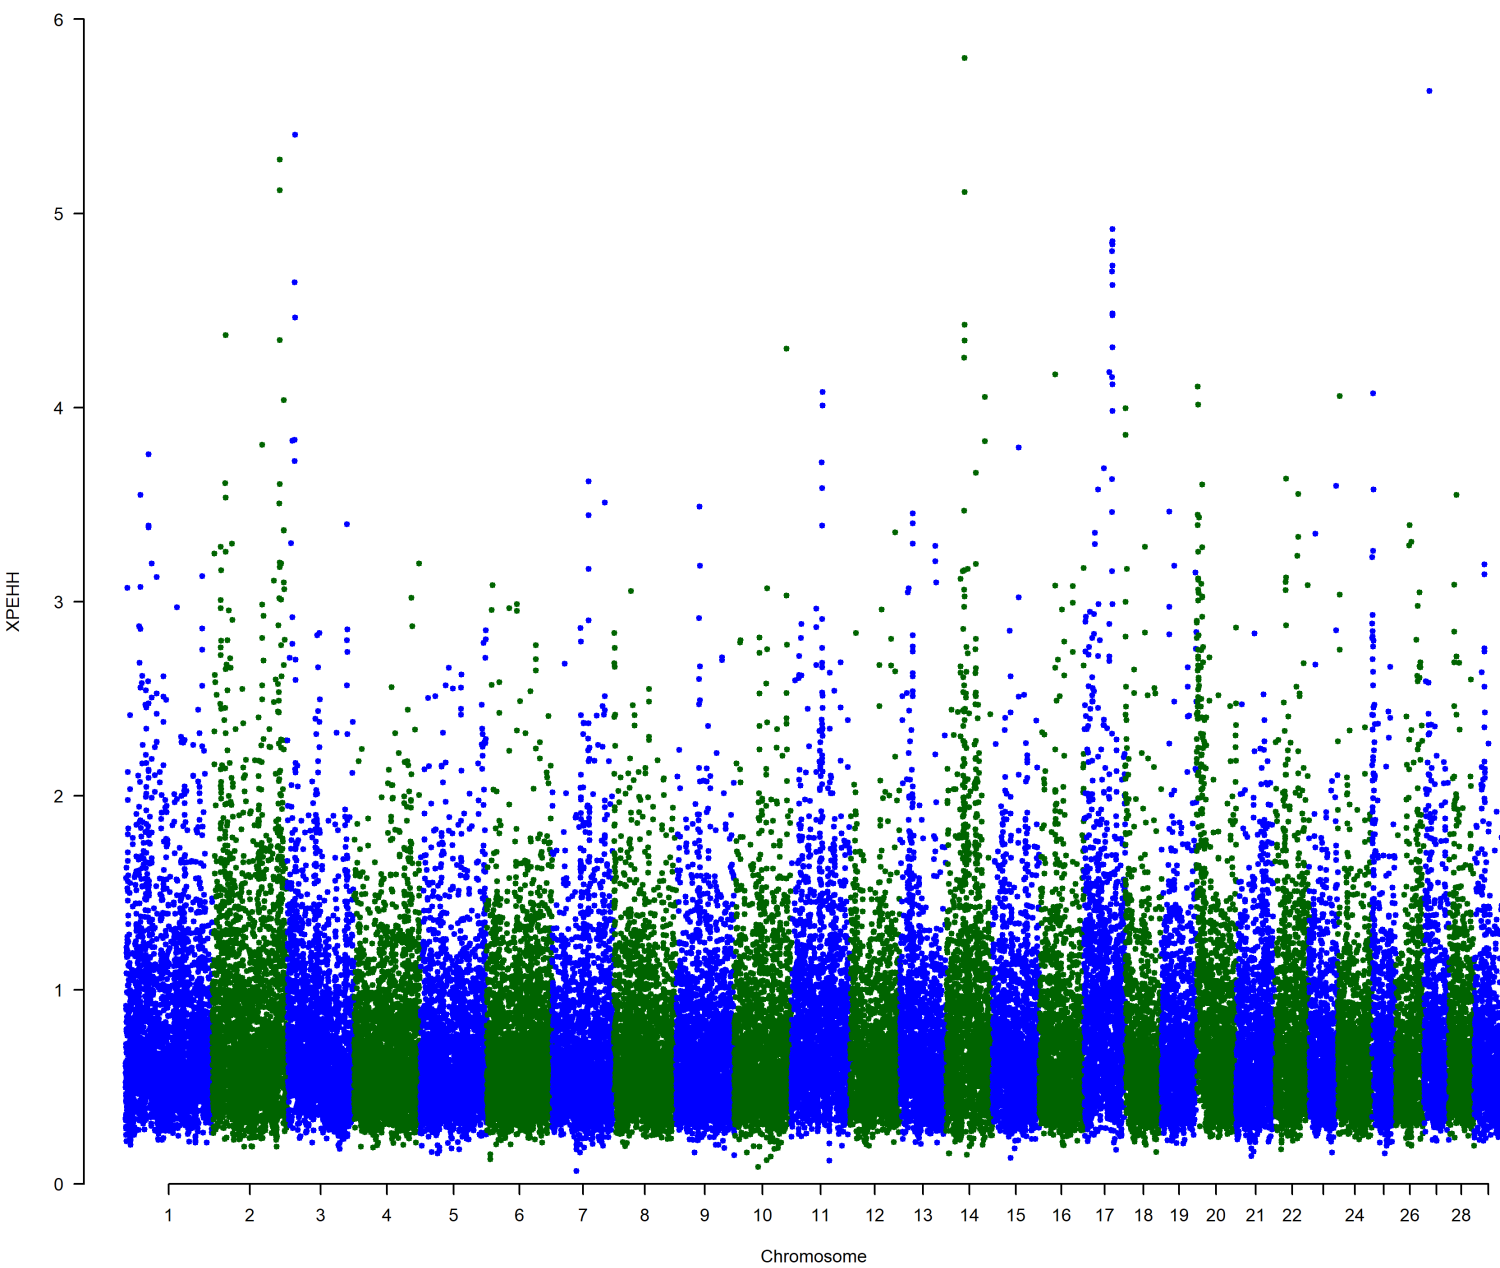

Crioulo and Caracu

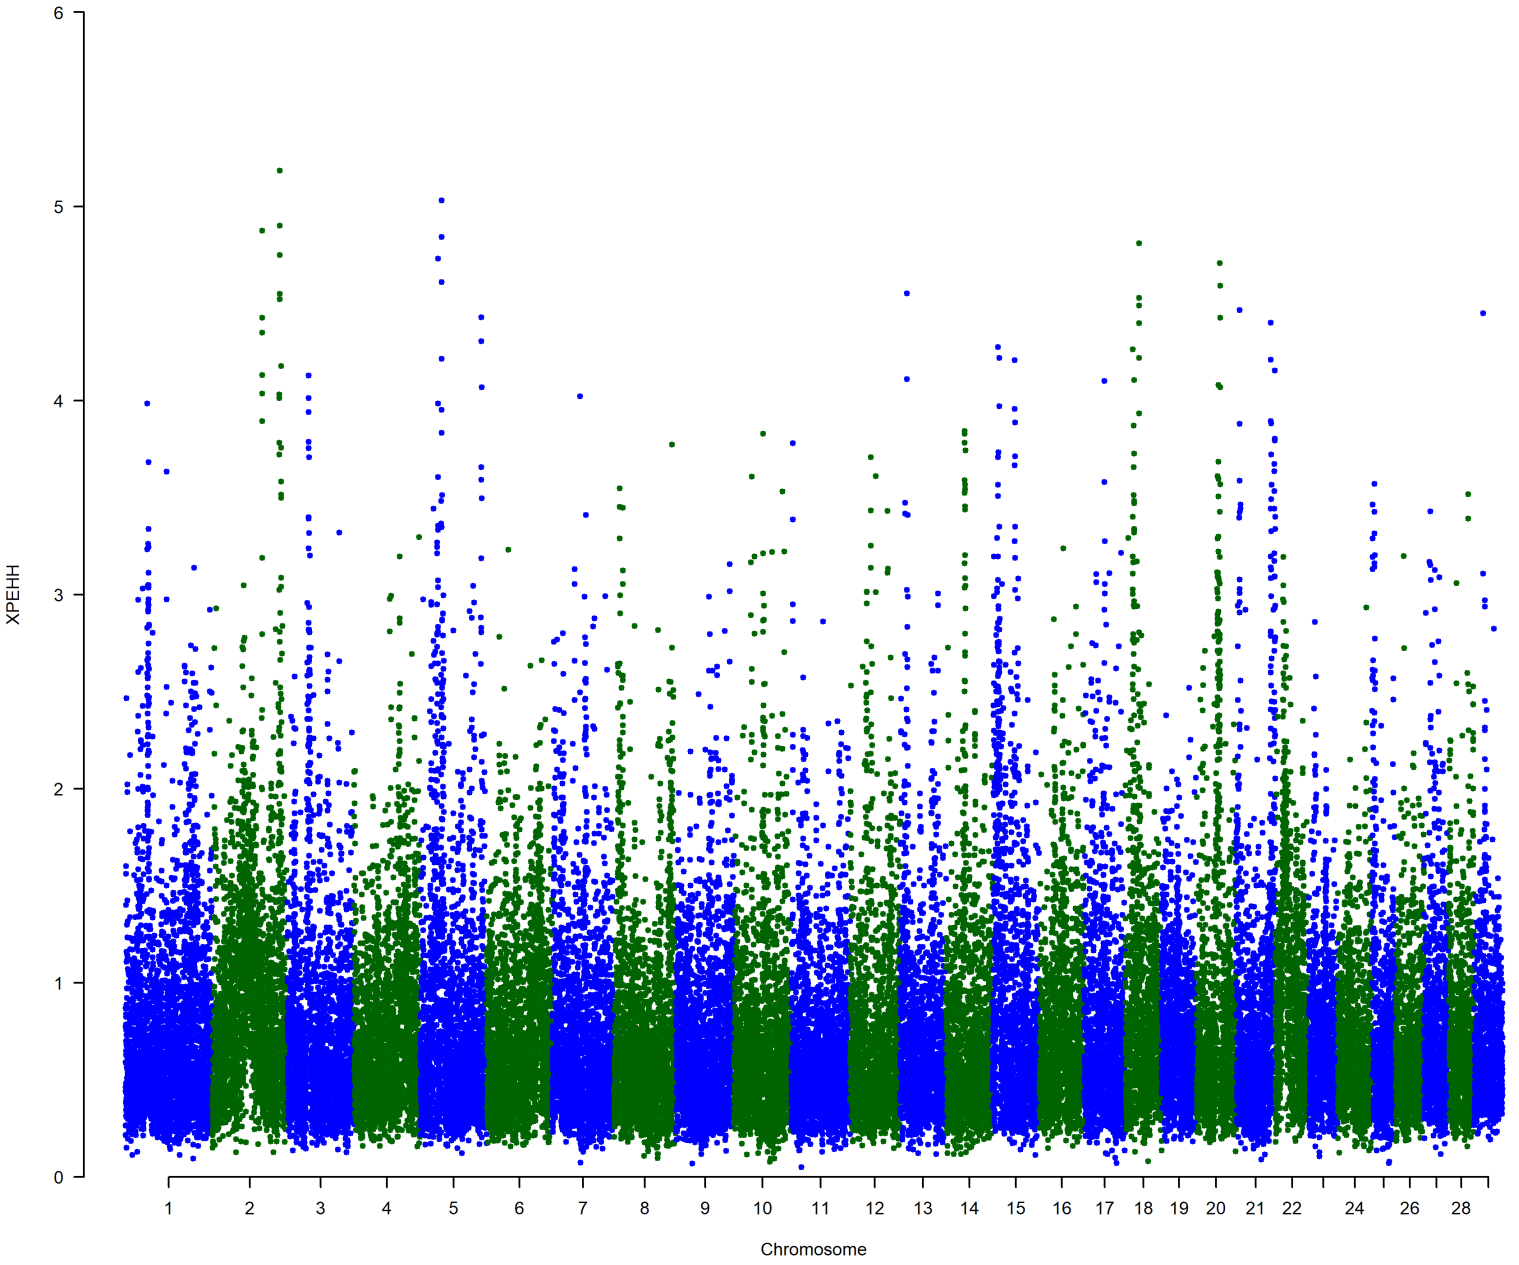

Supplement: 12864_2020_7035_MOESM13_ESM.pdf [file 12864_2020_7035_MOESM13_ESM.pdf]
