# Supplementary material for: Genome-wide detection of signatures of selection in indicine and Brazilian locally adapted taurine cattle breeds using whole-genome re-sequencing data
Source: PubMed Central journal article supplement (PMC7488563; doi:10.1186/s12864-020-07035-6), 2020-09-11

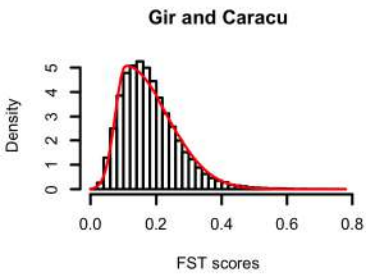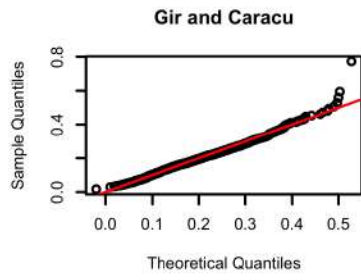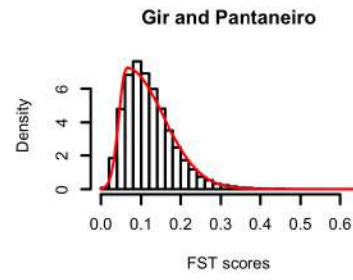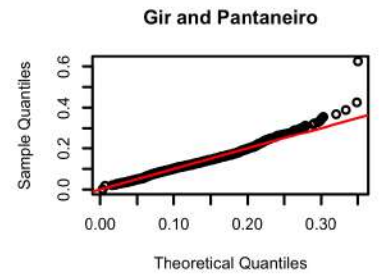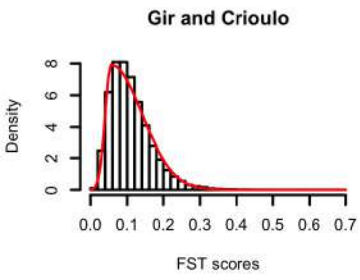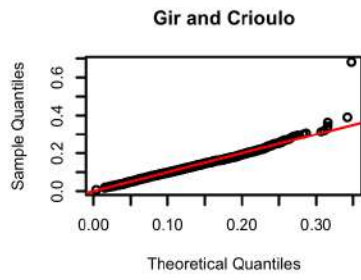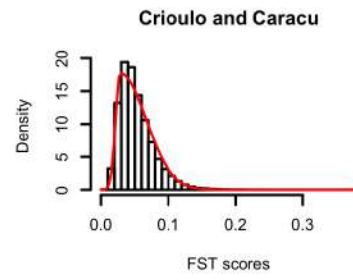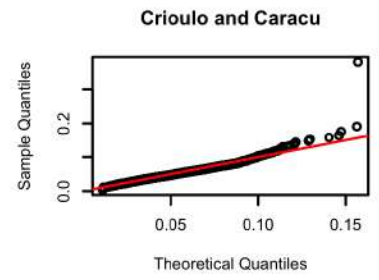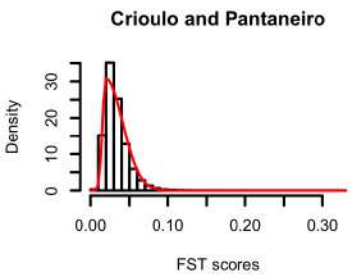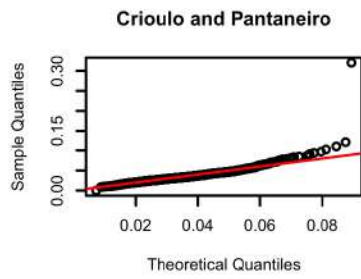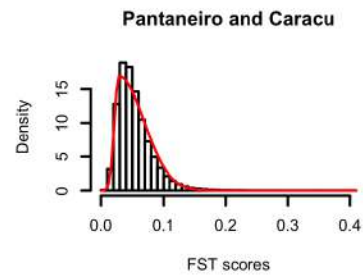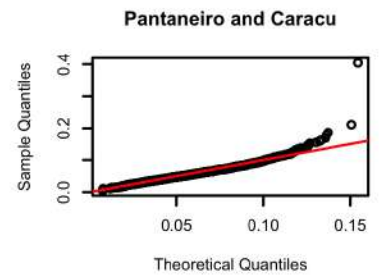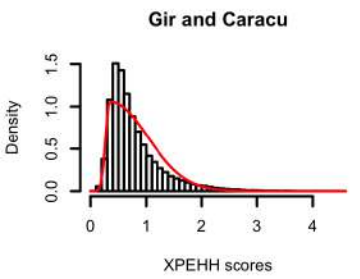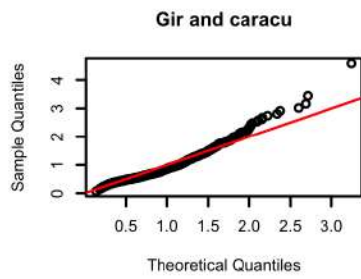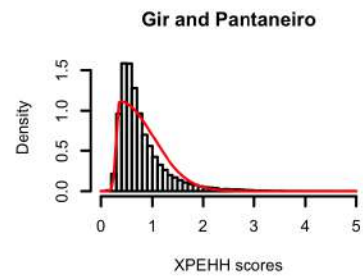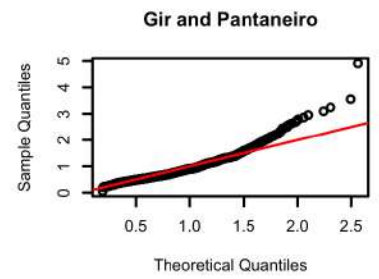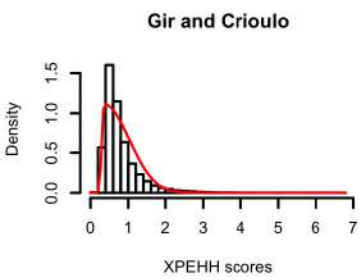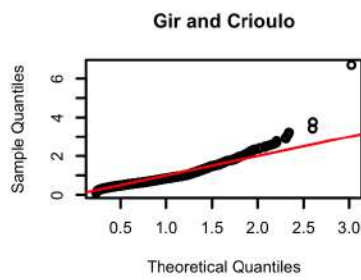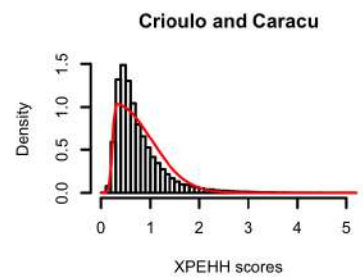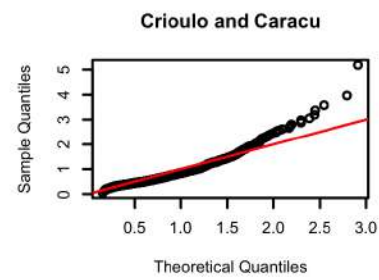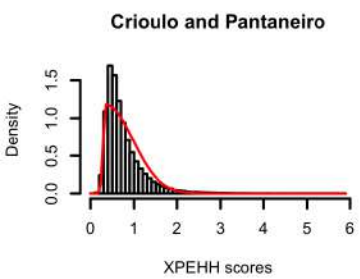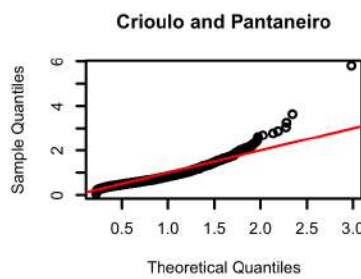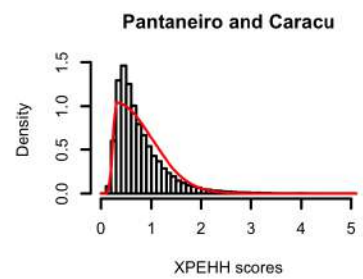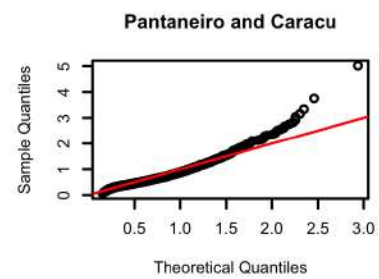

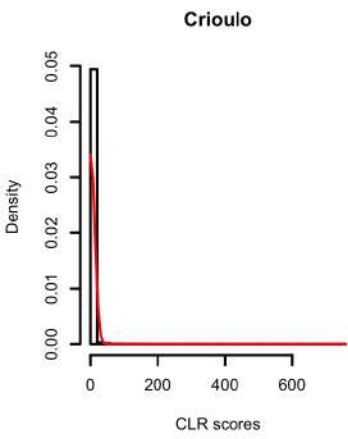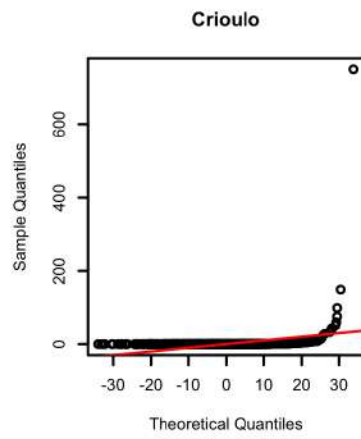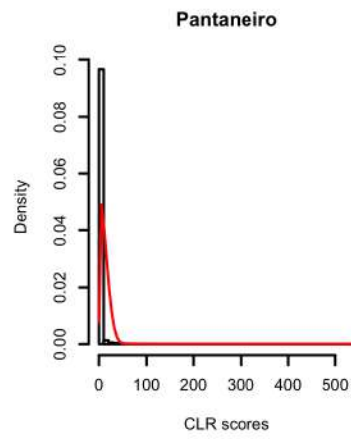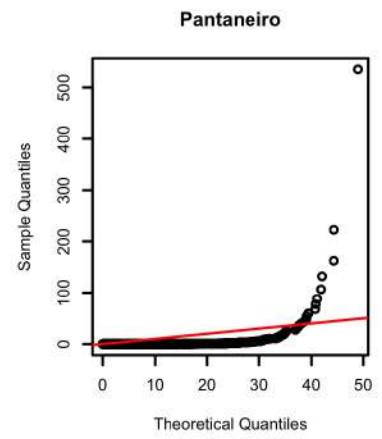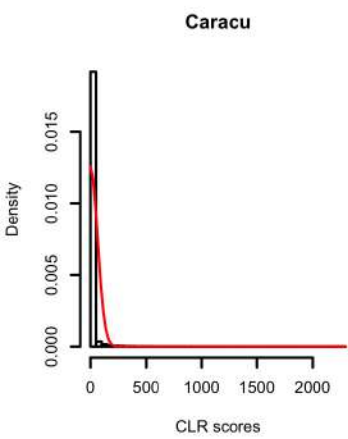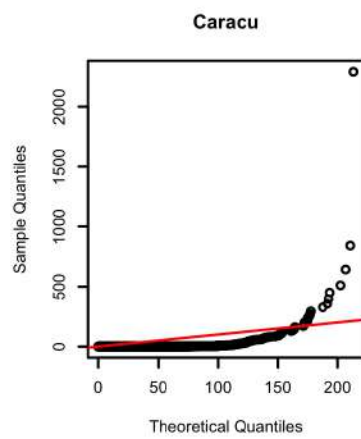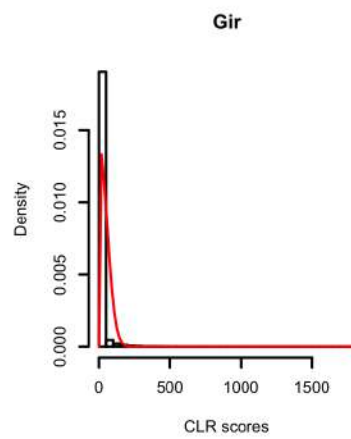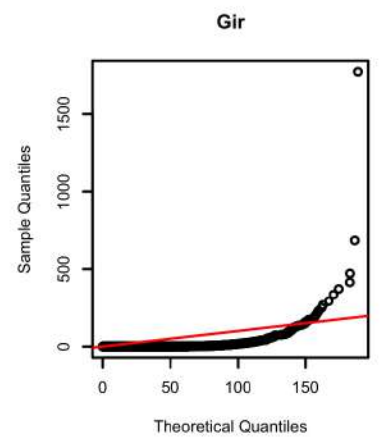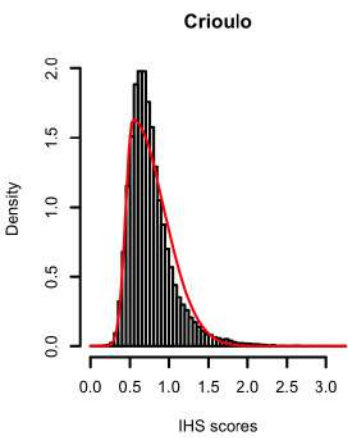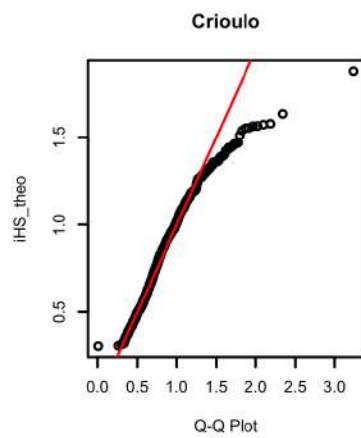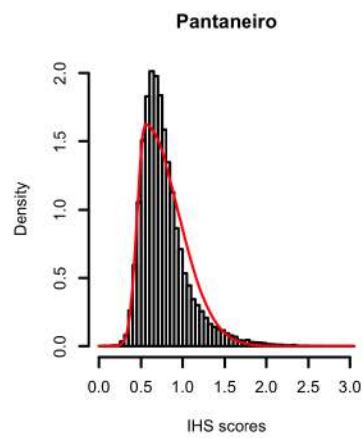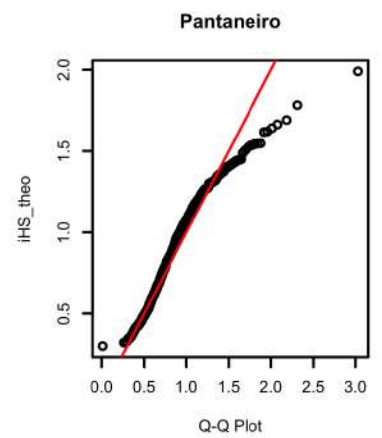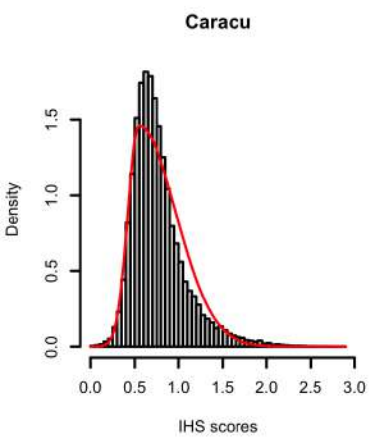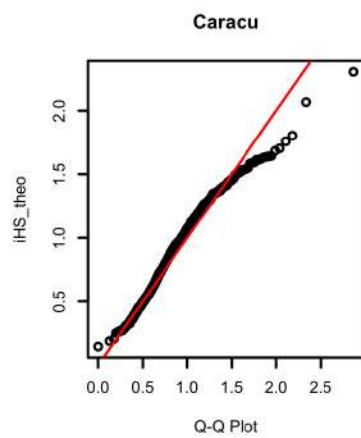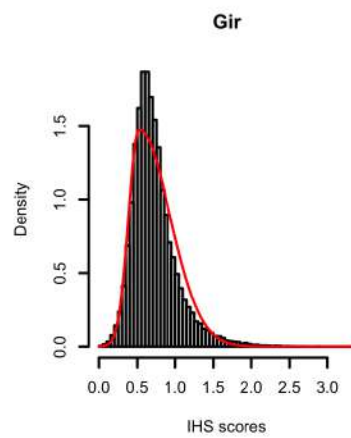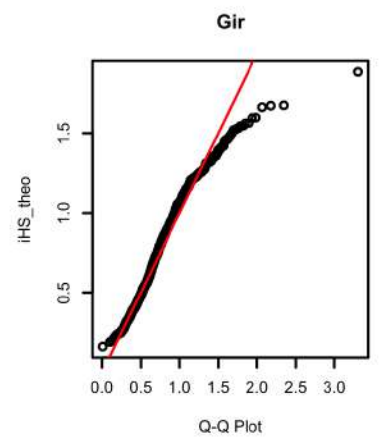

Supplement: 12864_2020_7035_MOESM14_ESM.pdf [file 12864_2020_7035_MOESM14_ESM.pdf]
